# Supplementary material for: Balancing land use for conservation, agriculture, and renewable energy
Source: Nat Commun. 2026 Mar 7;17:3623. doi: 10.1038/s41467-026-69952-6 (PMC13096339; doi:10.1038/s41467-026-69952-6)
Supplement: Supplementary file 3 — Supplementary Data 1 [file 41467_2026_69952_MOESM3_ESM.xlsx]

## Sheet: Brock et al. Supplementary Data
Country	Planning Scenario	Conservation Constraint	Sector	Area (sq km)	Area (%)
Afghanistan	Multi-Sector	None	Crops, food	128550	0.196702
Afghanistan	Multi-Sector	None	Crops, energy	7200	0.0110172
Afghanistan	Multi-Sector	None	Hydropower	2075	0.00317509
Afghanistan	Multi-Sector	None	Solar power	13650	0.0208867
Afghanistan	Multi-Sector	None	Conservation	478125	0.731609
Afghanistan	Multi-Sector	None	Current PAs	23725	0.0363031
Angola	Multi-Sector	None	Crops, food	153500	0.120795
Angola	Multi-Sector	None	Crops, energy	1275	0.00100334
Angola	Multi-Sector	None	Solar power	2450	0.001928
Angola	Multi-Sector	None	Hydropower	1575	0.00123943
Angola	Multi-Sector	None	Solar power	900	0.000708243
Angola	Multi-Sector	None	Wind power	225	0.000177061
Angola	Multi-Sector	None	Conservation	974475	0.76685
Angola	Multi-Sector	None	Current PAs	135975	0.107004
Albania	Multi-Sector	None	Crops, food	1375	0.0476603
Albania	Multi-Sector	None	Crops, energy	925	0.0320624
Albania	Multi-Sector	None	Solar power	25	0.000866551
Albania	Multi-Sector	None	Hydropower	25	0.000866551
Albania	Multi-Sector	None	Solar power	100	0.0034662
Albania	Multi-Sector	None	Wind power	3025	0.104853
Albania	Multi-Sector	None	Conservation	18425	0.638648
Albania	Multi-Sector	None	Current PAs	4875	0.168977
Andorra	Multi-Sector	None	Current PAs	25	1
United Arab Emirates	Multi-Sector	None	Crops, food	200	0.00275198
United Arab Emirates	Multi-Sector	None	Solar power	29800	0.410045
United Arab Emirates	Multi-Sector	None	Solar power	19075	0.26247
United Arab Emirates	Multi-Sector	None	Wind power	1075	0.0147919
United Arab Emirates	Multi-Sector	None	Conservation	8850	0.121775
United Arab Emirates	Multi-Sector	None	Current PAs	13600	0.187135
Argentina	Multi-Sector	None	Crops, food	451575	0.159402
Argentina	Multi-Sector	None	Crops, energy	38250	0.0135019
Argentina	Multi-Sector	None	Solar power	160125	0.0565229
Argentina	Multi-Sector	None	Hydropower	12050	0.00425355
Argentina	Multi-Sector	None	Solar power	16200	0.00571847
Argentina	Multi-Sector	None	Wind power	16100	0.00568317
Argentina	Multi-Sector	None	Conservation	1893950	0.668549
Argentina	Multi-Sector	None	Current PAs	241675	0.0853094
Armenia	Multi-Sector	None	Crops, energy	700	0.023198
Armenia	Multi-Sector	None	Solar power	25	0.0008285
Armenia	Multi-Sector	None	Hydropower	2300	0.076222
Armenia	Multi-Sector	None	Solar power	75	0.0024855
Armenia	Multi-Sector	None	Wind power	2525	0.0836785
Armenia	Multi-Sector	None	Conservation	16975	0.562552
Armenia	Multi-Sector	None	Current PAs	7550	0.250207
Australia	Multi-Sector	None	Crops, food	937125	0.119483
Australia	Multi-Sector	None	Crops, energy	486675	0.062051
Australia	Multi-Sector	None	Solar power	1654275	0.21092
Australia	Multi-Sector	None	Hydropower	2550	0.000325124
Australia	Multi-Sector	None	Solar power	11425	0.00145669
Australia	Multi-Sector	None	Wind power	49275	0.00628255
Australia	Multi-Sector	None	Conservation	3137900	0.400082
Australia	Multi-Sector	None	Current PAs	1559475	0.198833
Austria	Multi-Sector	None	Crops, food	250	0.00292398
Austria	Multi-Sector	None	Crops, energy	2200	0.025731
Austria	Multi-Sector	None	Hydropower	3425	0.0400585
Austria	Multi-Sector	None	Solar power	4950	0.0578947
Austria	Multi-Sector	None	Wind power	6000	0.0701754
Austria	Multi-Sector	None	Conservation	44400	0.519298
Austria	Multi-Sector	None	Current PAs	23700	0.277193
Azerbaijan	Multi-Sector	None	Crops, energy	26750	0.303977
Azerbaijan	Multi-Sector	None	Solar power	625	0.00710227
Azerbaijan	Multi-Sector	None	Hydropower	475	0.00539773
Azerbaijan	Multi-Sector	None	Solar power	675	0.00767045
Azerbaijan	Multi-Sector	None	Wind power	3425	0.0389205
Azerbaijan	Multi-Sector	None	Conservation	48350	0.549432
Azerbaijan	Multi-Sector	None	Current PAs	7575	0.0860795
Burundi	Multi-Sector	None	Crops, food	6750	0.243024
Burundi	Multi-Sector	None	Crops, energy	800	0.0288029
Burundi	Multi-Sector	None	Hydropower	275	0.00990099
Burundi	Multi-Sector	None	Solar power	50	0.00180018
Burundi	Multi-Sector	None	Conservation	18025	0.648965
Burundi	Multi-Sector	None	Current PAs	1875	0.0675068
Belgium	Multi-Sector	None	Crops, food	200	0.0064
Belgium	Multi-Sector	None	Crops, energy	1775	0.0568
Belgium	Multi-Sector	None	Hydropower	1000	0.032
Belgium	Multi-Sector	None	Solar power	525	0.0168
Belgium	Multi-Sector	None	Wind power	3100	0.0992
Belgium	Multi-Sector	None	Conservation	20150	0.6448
Belgium	Multi-Sector	None	Current PAs	2775	0.0888
Benin	Multi-Sector	None	Crops, food	25525	0.214857
Benin	Multi-Sector	None	Crops, energy	525	0.00441919
Benin	Multi-Sector	None	Solar power	75	0.000631313
Benin	Multi-Sector	None	Hydropower	25	0.000210438
Benin	Multi-Sector	None	Solar power	100	0.000841751
Benin	Multi-Sector	None	Conservation	58625	0.493476
Benin	Multi-Sector	None	Current PAs	33550	0.282407
Burkina Faso	Multi-Sector	None	Crops, food	135250	0.485986
Burkina Faso	Multi-Sector	None	Crops, energy	4225	0.0151815
Burkina Faso	Multi-Sector	None	Hydropower	1075	0.00386274
Burkina Faso	Multi-Sector	None	Solar power	300	0.00107797
Burkina Faso	Multi-Sector	None	Conservation	90900	0.326626
Burkina Faso	Multi-Sector	None	Current PAs	46200	0.166008
Bangladesh	Multi-Sector	None	Crops, food	26225	0.190209
Bangladesh	Multi-Sector	None	Crops, energy	3600	0.0261106
Bangladesh	Multi-Sector	None	Solar power	575	0.00417044
Bangladesh	Multi-Sector	None	Hydropower	400	0.00290118
Bangladesh	Multi-Sector	None	Solar power	9075	0.0658205
Bangladesh	Multi-Sector	None	Conservation	86075	0.624297
Bangladesh	Multi-Sector	None	Current PAs	5675	0.0411605
Bulgaria	Multi-Sector	None	Crops, food	725	0.0063388
Bulgaria	Multi-Sector	None	Crops, energy	8475	0.0740984
Bulgaria	Multi-Sector	None	Hydropower	2375	0.020765
Bulgaria	Multi-Sector	None	Solar power	725	0.0063388
Bulgaria	Multi-Sector	None	Wind power	10875	0.095082
Bulgaria	Multi-Sector	None	Conservation	45375	0.396721
Bulgaria	Multi-Sector	None	Current PAs	45600	0.398689
The Bahamas	Multi-Sector	None	Crops, food	2100	0.16092
The Bahamas	Multi-Sector	None	Solar power	25	0.00191571
The Bahamas	Multi-Sector	None	Conservation	6425	0.492337
The Bahamas	Multi-Sector	None	Current PAs	4500	0.344828
Bosnia and Herzegovina	Multi-Sector	None	Crops, food	1050	0.0199241
Bosnia and Herzegovina	Multi-Sector	None	Crops, energy	2225	0.0422201
Bosnia and Herzegovina	Multi-Sector	None	Solar power	25	0.000474383
Bosnia and Herzegovina	Multi-Sector	None	Hydropower	150	0.0028463
Bosnia and Herzegovina	Multi-Sector	None	Solar power	475	0.00901328
Bosnia and Herzegovina	Multi-Sector	None	Wind power	2650	0.0502846
Bosnia and Herzegovina	Multi-Sector	None	Conservation	43800	0.83112
Bosnia and Herzegovina	Multi-Sector	None	Current PAs	2325	0.0441176
Belarus	Multi-Sector	None	Crops, energy	21800	0.1036
Belarus	Multi-Sector	None	Hydropower	125	0.000594036
Belarus	Multi-Sector	None	Solar power	1375	0.00653439
Belarus	Multi-Sector	None	Wind power	11725	0.0557206
Belarus	Multi-Sector	None	Conservation	147750	0.70215
Belarus	Multi-Sector	None	Current PAs	27400	0.130213
Belize	Multi-Sector	None	Crops, food	2625	0.113636
Belize	Multi-Sector	None	Crops, energy	150	0.00649351
Belize	Multi-Sector	None	Hydropower	50	0.0021645
Belize	Multi-Sector	None	Solar power	25	0.00108225
Belize	Multi-Sector	None	Conservation	11650	0.504329
Belize	Multi-Sector	None	Current PAs	8600	0.372294
Bolivia	Multi-Sector	None	Crops, food	123750	0.111486
Bolivia	Multi-Sector	None	Crops, energy	1425	0.00128378
Bolivia	Multi-Sector	None	Solar power	19000	0.0171171
Bolivia	Multi-Sector	None	Hydropower	625	0.000563063
Bolivia	Multi-Sector	None	Solar power	6500	0.00585586
Bolivia	Multi-Sector	None	Wind power	6700	0.00603604
Bolivia	Multi-Sector	None	Conservation	615200	0.554234
Bolivia	Multi-Sector	None	Current PAs	336750	0.303378
Brazil	Multi-Sector	None	Crops, food	1837825	0.21244
Brazil	Multi-Sector	None	Crops, energy	81125	0.0093775
Brazil	Multi-Sector	None	Solar power	2575	0.000297653
Brazil	Multi-Sector	None	Hydropower	3675	0.000424805
Brazil	Multi-Sector	None	Solar power	22250	0.00257195
Brazil	Multi-Sector	None	Wind power	97800	0.011305
Brazil	Multi-Sector	None	Conservation	3989400	0.461148
Brazil	Multi-Sector	None	Current PAs	2612450	0.301982
Bhutan	Multi-Sector	None	Crops, food	2550	0.0628466
Bhutan	Multi-Sector	None	Crops, energy	75	0.00184843
Bhutan	Multi-Sector	None	Hydropower	900	0.0221811
Bhutan	Multi-Sector	None	Conservation	17350	0.427603
Bhutan	Multi-Sector	None	Current PAs	19700	0.485521
Botswana	Multi-Sector	None	Crops, food	47250	0.0800034
Botswana	Multi-Sector	None	Crops, energy	28950	0.0490179
Botswana	Multi-Sector	None	Solar power	6575	0.0111327
Botswana	Multi-Sector	None	Solar power	6475	0.0109634
Botswana	Multi-Sector	None	Wind power	4675	0.00791568
Botswana	Multi-Sector	None	Conservation	322375	0.545843
Botswana	Multi-Sector	None	Current PAs	174300	0.295124
Central African Republic	Multi-Sector	None	Crops, food	77300	0.122291
Central African Republic	Multi-Sector	None	Crops, energy	75	0.000118652
Central African Republic	Multi-Sector	None	Hydropower	125	0.000197754
Central African Republic	Multi-Sector	None	Conservation	440500	0.696883
Central African Republic	Multi-Sector	None	Current PAs	114050	0.18043
Canada	Multi-Sector	None	Crops, food	1096750	0.10917
Canada	Multi-Sector	None	Crops, energy	166100	0.0165336
Canada	Multi-Sector	None	Hydropower	127450	0.0126864
Canada	Multi-Sector	None	Solar power	81500	0.0081125
Canada	Multi-Sector	None	Wind power	760375	0.0756876
Canada	Multi-Sector	None	Conservation	5496150	0.547086
Canada	Multi-Sector	None	Current PAs	1304900	0.12989
Switzerland	Multi-Sector	None	Crops, food	500	0.0118694
Switzerland	Multi-Sector	None	Crops, energy	1050	0.0249258
Switzerland	Multi-Sector	None	Hydropower	2275	0.0540059
Switzerland	Multi-Sector	None	Solar power	2550	0.0605341
Switzerland	Multi-Sector	None	Wind power	2000	0.0474777
Switzerland	Multi-Sector	None	Conservation	29975	0.711573
Switzerland	Multi-Sector	None	Current PAs	3575	0.0848665
Chile	Multi-Sector	None	Crops, food	23975	0.03194
Chile	Multi-Sector	None	Crops, energy	11350	0.0151207
Chile	Multi-Sector	None	Solar power	77325	0.103014
Chile	Multi-Sector	None	Hydropower	11850	0.0157868
Chile	Multi-Sector	None	Solar power	27000	0.03597
Chile	Multi-Sector	None	Wind power	8175	0.0108909
Chile	Multi-Sector	None	Conservation	439550	0.585579
Chile	Multi-Sector	None	Current PAs	150675	0.200733
China	Multi-Sector	None	Crops, food	244575	0.0256394
China	Multi-Sector	None	Crops, energy	327550	0.0343379
China	Multi-Sector	None	Solar power	412000	0.043191
China	Multi-Sector	None	Hydropower	20950	0.00219624
China	Multi-Sector	None	Solar power	558800	0.0585804
China	Multi-Sector	None	Wind power	1193425	0.12511
China	Multi-Sector	None	Conservation	6522125	0.683731
China	Multi-Sector	None	Current PAs	164400	0.0172345
Ivory Coast	Multi-Sector	None	Crops, food	92100	0.280878
Ivory Coast	Multi-Sector	None	Crops, energy	1575	0.00480329
Ivory Coast	Multi-Sector	None	Solar power	900	0.00274474
Ivory Coast	Multi-Sector	None	Hydropower	1450	0.00442208
Ivory Coast	Multi-Sector	None	Solar power	175	0.000533699
Ivory Coast	Multi-Sector	None	Conservation	156925	0.478576
Ivory Coast	Multi-Sector	None	Current PAs	74400	0.226898
Cameroon	Multi-Sector	None	Crops, food	87875	0.185488
Cameroon	Multi-Sector	None	Crops, energy	575	0.00121372
Cameroon	Multi-Sector	None	Solar power	100	0.000211082
Cameroon	Multi-Sector	None	Hydropower	350	0.000738786
Cameroon	Multi-Sector	None	Solar power	200	0.000422164
Cameroon	Multi-Sector	None	Wind power	3450	0.00728232
Cameroon	Multi-Sector	None	Conservation	327525	0.691346
Cameroon	Multi-Sector	None	Current PAs	53475	0.112876
Democratic Republic of the Congo	Multi-Sector	None	Crops, food	403025	0.169582
Democratic Republic of the Congo	Multi-Sector	None	Crops, energy	1575	0.000662718
Democratic Republic of the Congo	Multi-Sector	None	Solar power	375	0.00015779
Democratic Republic of the Congo	Multi-Sector	None	Hydropower	25	1.05193e-05
Democratic Republic of the Congo	Multi-Sector	None	Solar power	750	0.00031558
Democratic Republic of the Congo	Multi-Sector	None	Wind power	23100	0.00971987
Democratic Republic of the Congo	Multi-Sector	None	Conservation	1616325	0.680107
Democratic Republic of the Congo	Multi-Sector	None	Current PAs	328475	0.138214
Republic of Congo	Multi-Sector	None	Crops, food	54350	0.153835
Republic of Congo	Multi-Sector	None	Crops, energy	150	0.000424568
Republic of Congo	Multi-Sector	None	Hydropower	25	7.07614e-05
Republic of Congo	Multi-Sector	None	Solar power	50	0.000141523
Republic of Congo	Multi-Sector	None	Conservation	167975	0.475446
Republic of Congo	Multi-Sector	None	Current PAs	130675	0.36987
Colombia	Multi-Sector	None	Crops, food	157700	0.135907
Colombia	Multi-Sector	None	Crops, energy	6075	0.00523549
Colombia	Multi-Sector	None	Solar power	925	0.000797173
Colombia	Multi-Sector	None	Hydropower	2700	0.00232688
Colombia	Multi-Sector	None	Solar power	2200	0.00189598
Colombia	Multi-Sector	None	Wind power	6725	0.00579567
Colombia	Multi-Sector	None	Conservation	678500	0.584737
Colombia	Multi-Sector	None	Current PAs	305100	0.262938
Costa Rica	Multi-Sector	None	Crops, food	4075	0.077619
Costa Rica	Multi-Sector	None	Crops, energy	700	0.0133333
Costa Rica	Multi-Sector	None	Solar power	75	0.00142857
Costa Rica	Multi-Sector	None	Hydropower	550	0.0104762
Costa Rica	Multi-Sector	None	Solar power	200	0.00380952
Costa Rica	Multi-Sector	None	Wind power	725	0.0138095
Costa Rica	Multi-Sector	None	Conservation	32500	0.619048
Costa Rica	Multi-Sector	None	Current PAs	13450	0.25619
Cuba	Multi-Sector	None	Crops, food	1675	0.0150562
Cuba	Multi-Sector	None	Crops, energy	6400	0.0575281
Cuba	Multi-Sector	None	Solar power	1125	0.0101124
Cuba	Multi-Sector	None	Hydropower	650	0.0058427
Cuba	Multi-Sector	None	Solar power	950	0.00853933
Cuba	Multi-Sector	None	Wind power	5075	0.045618
Cuba	Multi-Sector	None	Conservation	79100	0.711011
Cuba	Multi-Sector	None	Current PAs	16175	0.145393
Czech Republic	Multi-Sector	None	Crops, food	425	0.00532248
Czech Republic	Multi-Sector	None	Crops, energy	4200	0.0525986
Czech Republic	Multi-Sector	None	Hydropower	2325	0.0291171
Czech Republic	Multi-Sector	None	Solar power	5750	0.07201
Czech Republic	Multi-Sector	None	Wind power	11125	0.139324
Czech Republic	Multi-Sector	None	Conservation	39025	0.488729
Czech Republic	Multi-Sector	None	Current PAs	16200	0.20288
Germany	Multi-Sector	None	Crops, food	3225	0.00889901
Germany	Multi-Sector	None	Crops, energy	26675	0.0736065
Germany	Multi-Sector	None	Hydropower	7875	0.0217301
Germany	Multi-Sector	None	Solar power	27025	0.0745723
Germany	Multi-Sector	None	Wind power	45250	0.124862
Germany	Multi-Sector	None	Conservation	121450	0.335127
Germany	Multi-Sector	None	Current PAs	124800	0.344371
Djibouti	Multi-Sector	None	Wind power	4125	0.186863
Djibouti	Multi-Sector	None	Conservation	17825	0.807475
Djibouti	Multi-Sector	None	Current PAs	125	0.00566251
Denmark	Multi-Sector	None	Crops, food	375	0.00871586
Denmark	Multi-Sector	None	Crops, energy	4825	0.112144
Denmark	Multi-Sector	None	Solar power	2150	0.0499709
Denmark	Multi-Sector	None	Wind power	4500	0.10459
Denmark	Multi-Sector	None	Conservation	27500	0.639163
Denmark	Multi-Sector	None	Current PAs	3450	0.0801859
Dominican Republic	Multi-Sector	None	Crops, food	850	0.0171978
Dominican Republic	Multi-Sector	None	Crops, energy	2150	0.0435003
Dominican Republic	Multi-Sector	None	Solar power	50	0.00101163
Dominican Republic	Multi-Sector	None	Hydropower	2650	0.0536166
Dominican Republic	Multi-Sector	None	Solar power	575	0.0116338
Dominican Republic	Multi-Sector	None	Wind power	1425	0.0288316
Dominican Republic	Multi-Sector	None	Conservation	29300	0.592817
Dominican Republic	Multi-Sector	None	Current PAs	12250	0.24785
Algeria	Multi-Sector	None	Crops, food	65700	0.0277872
Algeria	Multi-Sector	None	Crops, energy	9675	0.00409195
Algeria	Multi-Sector	None	Solar power	266150	0.112566
Algeria	Multi-Sector	None	Hydropower	1000	0.00042294
Algeria	Multi-Sector	None	Solar power	5925	0.00250592
Algeria	Multi-Sector	None	Wind power	139200	0.0588733
Algeria	Multi-Sector	None	Conservation	235625	0.0996553
Algeria	Multi-Sector	None	Current PAs	1288575	0.54499
Ecuador	Multi-Sector	None	Crops, food	11075	0.042588
Ecuador	Multi-Sector	None	Crops, energy	3375	0.0129783
Ecuador	Multi-Sector	None	Solar power	575	0.00221111
Ecuador	Multi-Sector	None	Hydropower	3300	0.0126899
Ecuador	Multi-Sector	None	Solar power	1650	0.00634493
Ecuador	Multi-Sector	None	Wind power	7175	0.0275908
Ecuador	Multi-Sector	None	Conservation	173025	0.665353
Ecuador	Multi-Sector	None	Current PAs	59150	0.227456
Egypt	Multi-Sector	None	Crops, food	8200	0.00803626
Egypt	Multi-Sector	None	Crops, energy	625	0.00061252
Egypt	Multi-Sector	None	Solar power	358125	0.350974
Egypt	Multi-Sector	None	Hydropower	400	0.000392013
Egypt	Multi-Sector	None	Solar power	34375	0.0336886
Egypt	Multi-Sector	None	Wind power	315475	0.309176
Egypt	Multi-Sector	None	Conservation	125225	0.122724
Egypt	Multi-Sector	None	Current PAs	131525	0.128899
Eritrea	Multi-Sector	None	Crops, food	8525	0.0677125
Eritrea	Multi-Sector	None	Crops, energy	1975	0.0156871
Eritrea	Multi-Sector	None	Solar power	34900	0.277204
Eritrea	Multi-Sector	None	Solar power	5250	0.0416998
Eritrea	Multi-Sector	None	Wind power	150	0.00119142
Eritrea	Multi-Sector	None	Conservation	75025	0.595909
Eritrea	Multi-Sector	None	Current PAs	75	0.000595711
Spain	Multi-Sector	None	Crops, food	58050	0.112647
Spain	Multi-Sector	None	Crops, energy	23500	0.0456023
Spain	Multi-Sector	None	Solar power	900	0.00174647
Spain	Multi-Sector	None	Hydropower	12650	0.0245476
Spain	Multi-Sector	None	Solar power	5025	0.00975113
Spain	Multi-Sector	None	Wind power	45300	0.0879057
Spain	Multi-Sector	None	Conservation	231775	0.449765
Spain	Multi-Sector	None	Current PAs	137500	0.266822
Estonia	Multi-Sector	None	Crops, food	3650	0.0787062
Estonia	Multi-Sector	None	Crops, energy	925	0.0199461
Estonia	Multi-Sector	None	Hydropower	50	0.00107817
Estonia	Multi-Sector	None	Solar power	425	0.00916442
Estonia	Multi-Sector	None	Wind power	1625	0.0350404
Estonia	Multi-Sector	None	Conservation	32575	0.702426
Estonia	Multi-Sector	None	Current PAs	7125	0.153639
Ethiopia	Multi-Sector	None	Crops, food	141825	0.123069
Ethiopia	Multi-Sector	None	Crops, energy	3600	0.00312392
Ethiopia	Multi-Sector	None	Solar power	46975	0.0407628
Ethiopia	Multi-Sector	None	Hydropower	975	0.00084606
Ethiopia	Multi-Sector	None	Solar power	2225	0.00193075
Ethiopia	Multi-Sector	None	Wind power	9800	0.00850399
Ethiopia	Multi-Sector	None	Conservation	750475	0.651228
Ethiopia	Multi-Sector	None	Current PAs	196325	0.170362
Finland	Multi-Sector	None	Crops, food	25250	0.0750985
Finland	Multi-Sector	None	Crops, energy	400	0.00118968
Finland	Multi-Sector	None	Hydropower	625	0.00185887
Finland	Multi-Sector	None	Solar power	600	0.00178452
Finland	Multi-Sector	None	Wind power	21375	0.0635735
Finland	Multi-Sector	None	Conservation	250675	0.745557
Finland	Multi-Sector	None	Current PAs	37275	0.110863
Fiji	Multi-Sector	None	Crops, food	2700	0.144
Fiji	Multi-Sector	None	Hydropower	275	0.0146667
Fiji	Multi-Sector	None	Solar power	100	0.00533333
Fiji	Multi-Sector	None	Conservation	15000	0.8
Fiji	Multi-Sector	None	Current PAs	550	0.0293333
France	Multi-Sector	None	Crops, food	6450	0.0100381
France	Multi-Sector	None	Crops, energy	38550	0.0599953
France	Multi-Sector	None	Solar power	1700	0.00264571
France	Multi-Sector	None	Hydropower	15650	0.0243561
France	Multi-Sector	None	Solar power	18125	0.0282079
France	Multi-Sector	None	Wind power	77750	0.121002
France	Multi-Sector	None	Conservation	285275	0.443973
France	Multi-Sector	None	Current PAs	195025	0.303517
Gabon	Multi-Sector	None	Crops, food	11750	0.0442853
Gabon	Multi-Sector	None	Crops, energy	50	0.000188448
Gabon	Multi-Sector	None	Hydropower	50	0.000188448
Gabon	Multi-Sector	None	Solar power	575	0.00216715
Gabon	Multi-Sector	None	Conservation	193400	0.728917
Gabon	Multi-Sector	None	Current PAs	59500	0.224253
United Kingdom	Multi-Sector	None	Crops, food	1050	0.00430548
United Kingdom	Multi-Sector	None	Crops, energy	5050	0.0207073
United Kingdom	Multi-Sector	None	Hydropower	5100	0.0209124
United Kingdom	Multi-Sector	None	Solar power	29275	0.120041
United Kingdom	Multi-Sector	None	Wind power	24875	0.101999
United Kingdom	Multi-Sector	None	Conservation	110775	0.454229
United Kingdom	Multi-Sector	None	Current PAs	62275	0.255356
Georgia	Multi-Sector	None	Crops, energy	7625	0.108079
Georgia	Multi-Sector	None	Hydropower	2575	0.0364989
Georgia	Multi-Sector	None	Solar power	325	0.00460666
Georgia	Multi-Sector	None	Wind power	1925	0.0272856
Georgia	Multi-Sector	None	Conservation	50925	0.721828
Georgia	Multi-Sector	None	Current PAs	7125	0.100992
Ghana	Multi-Sector	None	Crops, food	50250	0.206154
Ghana	Multi-Sector	None	Crops, energy	2350	0.00964103
Ghana	Multi-Sector	None	Solar power	175	0.000717949
Ghana	Multi-Sector	None	Hydropower	13550	0.0555897
Ghana	Multi-Sector	None	Solar power	250	0.00102564
Ghana	Multi-Sector	None	Wind power	375	0.00153846
Ghana	Multi-Sector	None	Conservation	140250	0.575385
Ghana	Multi-Sector	None	Current PAs	34675	0.142256
Guinea	Multi-Sector	None	Crops, food	33800	0.13562
Guinea	Multi-Sector	None	Crops, energy	475	0.00190591
Guinea	Multi-Sector	None	Hydropower	1300	0.00521617
Guinea	Multi-Sector	None	Solar power	25	0.000100311
Guinea	Multi-Sector	None	Conservation	123325	0.494834
Guinea	Multi-Sector	None	Current PAs	90225	0.362022
Gambia	Multi-Sector	None	Crops, food	2075	0.194836
Gambia	Multi-Sector	None	Crops, energy	175	0.0164319
Gambia	Multi-Sector	None	Solar power	25	0.00234742
Gambia	Multi-Sector	None	Conservation	7650	0.71831
Gambia	Multi-Sector	None	Current PAs	675	0.0633803
Guinea Bissau	Multi-Sector	None	Crops, food	3150	0.0965517
Guinea Bissau	Multi-Sector	None	Crops, energy	100	0.00306513
Guinea Bissau	Multi-Sector	None	Solar power	25	0.000766284
Guinea Bissau	Multi-Sector	None	Conservation	21525	0.65977
Guinea Bissau	Multi-Sector	None	Current PAs	7825	0.239847
Equatorial Guinea	Multi-Sector	None	Crops, food	1400	0.0512821
Equatorial Guinea	Multi-Sector	None	Crops, energy	75	0.00274725
Equatorial Guinea	Multi-Sector	None	Hydropower	100	0.003663
Equatorial Guinea	Multi-Sector	None	Conservation	20675	0.757326
Equatorial Guinea	Multi-Sector	None	Current PAs	5050	0.184982
Greece	Multi-Sector	None	Crops, food	400	0.00302686
Greece	Multi-Sector	None	Crops, energy	3925	0.0297011
Greece	Multi-Sector	None	Solar power	325	0.00245933
Greece	Multi-Sector	None	Hydropower	2500	0.0189179
Greece	Multi-Sector	None	Solar power	725	0.00548619
Greece	Multi-Sector	None	Wind power	13725	0.103859
Greece	Multi-Sector	None	Conservation	67725	0.512486
Greece	Multi-Sector	None	Current PAs	42425	0.321037
Guatemala	Multi-Sector	None	Crops, food	12650	0.11417
Guatemala	Multi-Sector	None	Crops, energy	1200	0.0108303
Guatemala	Multi-Sector	None	Solar power	50	0.000451264
Guatemala	Multi-Sector	None	Hydropower	50	0.000451264
Guatemala	Multi-Sector	None	Solar power	250	0.00225632
Guatemala	Multi-Sector	None	Wind power	2175	0.01963
Guatemala	Multi-Sector	None	Conservation	73075	0.659522
Guatemala	Multi-Sector	None	Current PAs	21200	0.191336
Guyana	Multi-Sector	None	Crops, food	28500	0.132143
Guyana	Multi-Sector	None	Crops, energy	25	0.000115915
Guyana	Multi-Sector	None	Hydropower	25	0.000115915
Guyana	Multi-Sector	None	Solar power	25	0.000115915
Guyana	Multi-Sector	None	Conservation	168425	0.78092
Guyana	Multi-Sector	None	Current PAs	18675	0.0865886
Honduras	Multi-Sector	None	Crops, food	10250	0.0886295
Honduras	Multi-Sector	None	Crops, energy	925	0.00799827
Honduras	Multi-Sector	None	Solar power	50	0.000432339
Honduras	Multi-Sector	None	Hydropower	1000	0.00864678
Honduras	Multi-Sector	None	Solar power	200	0.00172936
Honduras	Multi-Sector	None	Wind power	2175	0.0188067
Honduras	Multi-Sector	None	Conservation	74500	0.644185
Honduras	Multi-Sector	None	Current PAs	26450	0.228707
Croatia	Multi-Sector	None	Crops, food	425	0.00768883
Croatia	Multi-Sector	None	Crops, energy	5050	0.0913614
Croatia	Multi-Sector	None	Solar power	75	0.00135685
Croatia	Multi-Sector	None	Hydropower	300	0.00542741
Croatia	Multi-Sector	None	Solar power	1775	0.0321122
Croatia	Multi-Sector	None	Wind power	2050	0.0370873
Croatia	Multi-Sector	None	Conservation	25825	0.467209
Croatia	Multi-Sector	None	Current PAs	19625	0.355043
Haiti	Multi-Sector	None	Crops, food	1250	0.0457457
Haiti	Multi-Sector	None	Crops, energy	575	0.021043
Haiti	Multi-Sector	None	Solar power	50	0.00182983
Haiti	Multi-Sector	None	Hydropower	350	0.0128088
Haiti	Multi-Sector	None	Solar power	200	0.0073193
Haiti	Multi-Sector	None	Wind power	475	0.0173833
Haiti	Multi-Sector	None	Conservation	22100	0.808783
Haiti	Multi-Sector	None	Current PAs	2175	0.0795974
Hungary	Multi-Sector	None	Crops, food	1050	0.0111052
Hungary	Multi-Sector	None	Crops, energy	13350	0.141195
Hungary	Multi-Sector	None	Hydropower	50	0.000528821
Hungary	Multi-Sector	None	Solar power	4950	0.0523533
Hungary	Multi-Sector	None	Wind power	5100	0.0539397
Hungary	Multi-Sector	None	Conservation	51625	0.546007
Hungary	Multi-Sector	None	Current PAs	17975	0.190111
Indonesia	Multi-Sector	None	Crops, food	253600	0.13302
Indonesia	Multi-Sector	None	Crops, energy	19250	0.0100972
Indonesia	Multi-Sector	None	Solar power	2800	0.00146868
Indonesia	Multi-Sector	None	Hydropower	400	0.000209811
Indonesia	Multi-Sector	None	Solar power	19775	0.0103725
Indonesia	Multi-Sector	None	Wind power	23750	0.0124575
Indonesia	Multi-Sector	None	Conservation	1350675	0.708467
Indonesia	Multi-Sector	None	Current PAs	226925	0.119029
India	Multi-Sector	None	Crops, food	737625	0.229657
India	Multi-Sector	None	Crops, energy	46800	0.014571
India	Multi-Sector	None	Solar power	54775	0.017054
India	Multi-Sector	None	Hydropower	16525	0.00514501
India	Multi-Sector	None	Solar power	113325	0.0352834
India	Multi-Sector	None	Wind power	285025	0.0887417
India	Multi-Sector	None	Conservation	1917500	0.597008
India	Multi-Sector	None	Current PAs	21575	0.00671731
Ireland	Multi-Sector	None	Crops, food	3125	0.0446269
Ireland	Multi-Sector	None	Crops, energy	25	0.000357015
Ireland	Multi-Sector	None	Hydropower	600	0.00856837
Ireland	Multi-Sector	None	Solar power	1450	0.0207069
Ireland	Multi-Sector	None	Wind power	3200	0.045698
Ireland	Multi-Sector	None	Conservation	53475	0.763656
Ireland	Multi-Sector	None	Current PAs	8025	0.114602
Iran	Multi-Sector	None	Crops, food	580975	0.351669
Iran	Multi-Sector	None	Crops, energy	4725	0.00286008
Iran	Multi-Sector	None	Solar power	336675	0.203792
Iran	Multi-Sector	None	Hydropower	17475	0.0105778
Iran	Multi-Sector	None	Solar power	54925	0.0332466
Iran	Multi-Sector	None	Wind power	118025	0.0714415
Iran	Multi-Sector	None	Conservation	397075	0.240353
Iran	Multi-Sector	None	Current PAs	139850	0.0846524
Iraq	Multi-Sector	None	Crops, food	198550	0.445879
Iraq	Multi-Sector	None	Crops, energy	2075	0.00465978
Iraq	Multi-Sector	None	Solar power	146425	0.328823
Iraq	Multi-Sector	None	Hydropower	2725	0.00611947
Iraq	Multi-Sector	None	Solar power	7300	0.0163934
Iraq	Multi-Sector	None	Wind power	3650	0.00819672
Iraq	Multi-Sector	None	Conservation	77500	0.17404
Iraq	Multi-Sector	None	Current PAs	6525	0.014653
Iceland	Multi-Sector	None	Hydropower	26175	0.25425
Iceland	Multi-Sector	None	Wind power	18500	0.179699
Iceland	Multi-Sector	None	Conservation	36650	0.355998
Iceland	Multi-Sector	None	Current PAs	21000	0.203983
Israel	Multi-Sector	None	Crops, food	500	0.0220264
Israel	Multi-Sector	None	Crops, energy	75	0.00330396
Israel	Multi-Sector	None	Solar power	1025	0.0451542
Israel	Multi-Sector	None	Hydropower	550	0.0242291
Israel	Multi-Sector	None	Solar power	1625	0.0715859
Israel	Multi-Sector	None	Wind power	1700	0.0748899
Israel	Multi-Sector	None	Conservation	11150	0.491189
Israel	Multi-Sector	None	Current PAs	4525	0.199339
Italy	Multi-Sector	None	Crops, food	900	0.00294695
Italy	Multi-Sector	None	Crops, energy	8775	0.0287328
Italy	Multi-Sector	None	Solar power	2300	0.00753111
Italy	Multi-Sector	None	Hydropower	7275	0.0238212
Italy	Multi-Sector	None	Solar power	7500	0.024558
Italy	Multi-Sector	None	Wind power	57900	0.189587
Italy	Multi-Sector	None	Conservation	142950	0.468075
Italy	Multi-Sector	None	Current PAs	56625	0.185413
Jamaica	Multi-Sector	None	Crops, food	150	0.013363
Jamaica	Multi-Sector	None	Crops, energy	500	0.0445434
Jamaica	Multi-Sector	None	Solar power	25	0.00222717
Jamaica	Multi-Sector	None	Hydropower	50	0.00445434
Jamaica	Multi-Sector	None	Solar power	450	0.0400891
Jamaica	Multi-Sector	None	Wind power	75	0.00668151
Jamaica	Multi-Sector	None	Conservation	7750	0.690423
Jamaica	Multi-Sector	None	Current PAs	2025	0.180401
Jordan	Multi-Sector	None	Crops, food	4775	0.0527479
Jordan	Multi-Sector	None	Crops, energy	125	0.00138083
Jordan	Multi-Sector	None	Solar power	52825	0.58354
Jordan	Multi-Sector	None	Hydropower	500	0.00552334
Jordan	Multi-Sector	None	Solar power	2350	0.0259597
Jordan	Multi-Sector	None	Wind power	6950	0.0767744
Jordan	Multi-Sector	None	Conservation	18500	0.204363
Jordan	Multi-Sector	None	Current PAs	4025	0.0444629
Japan	Multi-Sector	None	Crops, food	1000	0.00265534
Japan	Multi-Sector	None	Crops, energy	3425	0.00909453
Japan	Multi-Sector	None	Hydropower	14775	0.0392326
Japan	Multi-Sector	None	Solar power	17525	0.0465348
Japan	Multi-Sector	None	Wind power	50550	0.134227
Japan	Multi-Sector	None	Conservation	209325	0.555828
Japan	Multi-Sector	None	Current PAs	62475	0.165892
Kazakhstan	Multi-Sector	None	Crops, energy	305175	0.110515
Kazakhstan	Multi-Sector	None	Hydropower	15700	0.00568552
Kazakhstan	Multi-Sector	None	Solar power	17950	0.00650033
Kazakhstan	Multi-Sector	None	Wind power	50625	0.0183331
Kazakhstan	Multi-Sector	None	Conservation	2075825	0.751729
Kazakhstan	Multi-Sector	None	Current PAs	273250	0.0989534
Kenya	Multi-Sector	None	Crops, food	117600	0.194316
Kenya	Multi-Sector	None	Crops, energy	1250	0.00206543
Kenya	Multi-Sector	None	Solar power	23150	0.0382518
Kenya	Multi-Sector	None	Hydropower	1825	0.00301553
Kenya	Multi-Sector	None	Solar power	700	0.00115664
Kenya	Multi-Sector	None	Wind power	3900	0.00644415
Kenya	Multi-Sector	None	Conservation	384200	0.634831
Kenya	Multi-Sector	None	Current PAs	72325	0.119506
Kyrgyzstan	Multi-Sector	None	Crops, energy	5100	0.0252257
Kyrgyzstan	Multi-Sector	None	Solar power	4175	0.0206504
Kyrgyzstan	Multi-Sector	None	Hydropower	3450	0.0170644
Kyrgyzstan	Multi-Sector	None	Solar power	1450	0.007172
Kyrgyzstan	Multi-Sector	None	Wind power	14750	0.0729566
Kyrgyzstan	Multi-Sector	None	Conservation	159575	0.789291
Kyrgyzstan	Multi-Sector	None	Current PAs	13600	0.0672685
Cambodia	Multi-Sector	None	Crops, food	36150	0.195855
Cambodia	Multi-Sector	None	Crops, energy	10900	0.0590546
Cambodia	Multi-Sector	None	Solar power	100	0.000541785
Cambodia	Multi-Sector	None	Hydropower	200	0.00108357
Cambodia	Multi-Sector	None	Solar power	400	0.00216714
Cambodia	Multi-Sector	None	Wind power	3950	0.0214005
Cambodia	Multi-Sector	None	Conservation	59750	0.323717
Cambodia	Multi-Sector	None	Current PAs	72950	0.395232
South Korea	Multi-Sector	None	Crops, food	1850	0.0187058
South Korea	Multi-Sector	None	Crops, energy	5850	0.0591507
South Korea	Multi-Sector	None	Solar power	4050	0.0409505
South Korea	Multi-Sector	None	Hydropower	6100	0.0616785
South Korea	Multi-Sector	None	Solar power	2650	0.0267947
South Korea	Multi-Sector	None	Wind power	8900	0.0899899
South Korea	Multi-Sector	None	Conservation	55575	0.561931
South Korea	Multi-Sector	None	Current PAs	12150	0.122851
Kosovo	Multi-Sector	None	Crops, food	175	0.01566
Kosovo	Multi-Sector	None	Crops, energy	550	0.049217
Kosovo	Multi-Sector	None	Hydropower	75	0.00671141
Kosovo	Multi-Sector	None	Solar power	25	0.00223714
Kosovo	Multi-Sector	None	Wind power	1050	0.0939597
Kosovo	Multi-Sector	None	Conservation	8900	0.796421
Kosovo	Multi-Sector	None	Current PAs	400	0.0357942
Kuwait	Multi-Sector	None	Crops, food	3375	0.190678
Kuwait	Multi-Sector	None	Solar power	1425	0.0805085
Kuwait	Multi-Sector	None	Solar power	6225	0.351695
Kuwait	Multi-Sector	None	Wind power	350	0.019774
Kuwait	Multi-Sector	None	Conservation	2875	0.162429
Kuwait	Multi-Sector	None	Current PAs	2575	0.14548
Laos	Multi-Sector	None	Crops, food	23100	0.0990778
Laos	Multi-Sector	None	Crops, energy	6625	0.0284152
Laos	Multi-Sector	None	Hydropower	850	0.00364572
Laos	Multi-Sector	None	Solar power	50	0.000214454
Laos	Multi-Sector	None	Conservation	159375	0.683573
Laos	Multi-Sector	None	Current PAs	43125	0.184967
Liberia	Multi-Sector	None	Crops, food	32375	0.332222
Liberia	Multi-Sector	None	Crops, energy	575	0.00590046
Liberia	Multi-Sector	None	Hydropower	250	0.00256542
Liberia	Multi-Sector	None	Solar power	25	0.000256542
Liberia	Multi-Sector	None	Conservation	60300	0.618779
Liberia	Multi-Sector	None	Current PAs	3875	0.039764
Libya	Multi-Sector	None	Crops, food	54950	0.0331959
Libya	Multi-Sector	None	Crops, energy	2075	0.00125353
Libya	Multi-Sector	None	Solar power	1258125	0.760047
Libya	Multi-Sector	None	Solar power	100800	0.0608944
Libya	Multi-Sector	None	Wind power	8175	0.00493861
Libya	Multi-Sector	None	Conservation	229625	0.138719
Libya	Multi-Sector	None	Current PAs	1525	0.000921269
Sri Lanka	Multi-Sector	None	Crops, food	3125	0.0465549
Sri Lanka	Multi-Sector	None	Crops, energy	1475	0.0219739
Sri Lanka	Multi-Sector	None	Solar power	375	0.00558659
Sri Lanka	Multi-Sector	None	Hydropower	2600	0.0387337
Sri Lanka	Multi-Sector	None	Solar power	700	0.0104283
Sri Lanka	Multi-Sector	None	Wind power	5175	0.077095
Sri Lanka	Multi-Sector	None	Conservation	34375	0.512104
Sri Lanka	Multi-Sector	None	Current PAs	19000	0.283054
Lesotho	Multi-Sector	None	Crops, food	3800	0.124183
Lesotho	Multi-Sector	None	Crops, energy	975	0.0318627
Lesotho	Multi-Sector	None	Hydropower	300	0.00980392
Lesotho	Multi-Sector	None	Conservation	19375	0.63317
Lesotho	Multi-Sector	None	Current PAs	6125	0.200163
Lithuania	Multi-Sector	None	Crops, food	400	0.00608365
Lithuania	Multi-Sector	None	Crops, energy	11625	0.176806
Lithuania	Multi-Sector	None	Hydropower	325	0.00494297
Lithuania	Multi-Sector	None	Solar power	600	0.00912548
Lithuania	Multi-Sector	None	Wind power	3775	0.0574144
Lithuania	Multi-Sector	None	Conservation	39725	0.604183
Lithuania	Multi-Sector	None	Current PAs	9300	0.141445
Latvia	Multi-Sector	None	Crops, food	1250	0.0190985
Latvia	Multi-Sector	None	Crops, energy	3300	0.0504202
Latvia	Multi-Sector	None	Hydropower	100	0.00152788
Latvia	Multi-Sector	None	Solar power	425	0.00649351
Latvia	Multi-Sector	None	Wind power	2225	0.0339954
Latvia	Multi-Sector	None	Conservation	47875	0.731474
Latvia	Multi-Sector	None	Current PAs	10275	0.15699
Morocco	Multi-Sector	None	Crops, food	48725	0.0821566
Morocco	Multi-Sector	None	Crops, energy	10800	0.0182102
Morocco	Multi-Sector	None	Solar power	17050	0.0287485
Morocco	Multi-Sector	None	Hydropower	8475	0.0142899
Morocco	Multi-Sector	None	Solar power	2375	0.00400455
Morocco	Multi-Sector	None	Wind power	187200	0.315643
Morocco	Multi-Sector	None	Conservation	195600	0.329807
Morocco	Multi-Sector	None	Current PAs	122650	0.206804
Moldova	Multi-Sector	None	Crops, energy	13075	0.388848
Moldova	Multi-Sector	None	Hydropower	125	0.00371747
Moldova	Multi-Sector	None	Solar power	175	0.00520446
Moldova	Multi-Sector	None	Wind power	2050	0.0609665
Moldova	Multi-Sector	None	Conservation	15625	0.464684
Moldova	Multi-Sector	None	Current PAs	2400	0.0713755
Madagascar	Multi-Sector	None	Crops, food	82150	0.135656
Madagascar	Multi-Sector	None	Crops, energy	325	0.00053668
Madagascar	Multi-Sector	None	Hydropower	225	0.000371548
Madagascar	Multi-Sector	None	Solar power	150	0.000247698
Madagascar	Multi-Sector	None	Conservation	478200	0.789663
Madagascar	Multi-Sector	None	Current PAs	44500	0.0734839
Mexico	Multi-Sector	None	Crops, food	242550	0.121472
Mexico	Multi-Sector	None	Crops, energy	47600	0.0238387
Mexico	Multi-Sector	None	Solar power	40975	0.0205208
Mexico	Multi-Sector	None	Hydropower	6725	0.00336797
Mexico	Multi-Sector	None	Solar power	10800	0.00540879
Mexico	Multi-Sector	None	Wind power	55400	0.0277451
Mexico	Multi-Sector	None	Conservation	1295000	0.648554
Mexico	Multi-Sector	None	Current PAs	286750	0.143608
Macedonia	Multi-Sector	None	Crops, food	425	0.0163934
Macedonia	Multi-Sector	None	Crops, energy	4800	0.185149
Macedonia	Multi-Sector	None	Hydropower	275	0.0106075
Macedonia	Multi-Sector	None	Solar power	500	0.0192864
Macedonia	Multi-Sector	None	Wind power	2225	0.0858245
Macedonia	Multi-Sector	None	Conservation	13525	0.521697
Macedonia	Multi-Sector	None	Current PAs	4050	0.15622
Mali	Multi-Sector	None	Crops, food	170175	0.132869
Mali	Multi-Sector	None	Crops, energy	7625	0.00595343
Mali	Multi-Sector	None	Hydropower	925	0.000722219
Mali	Multi-Sector	None	Solar power	733500	0.5727
Mali	Multi-Sector	None	Conservation	271550	0.21202
Mali	Multi-Sector	None	Current PAs	96750	0.0755402
Myanmar	Multi-Sector	None	Crops, food	125675	0.186282
Myanmar	Multi-Sector	None	Crops, energy	3825	0.00566961
Myanmar	Multi-Sector	None	Solar power	150	0.000222338
Myanmar	Multi-Sector	None	Hydropower	600	0.00088935
Myanmar	Multi-Sector	None	Solar power	575	0.000852294
Myanmar	Multi-Sector	None	Wind power	9950	0.0147484
Myanmar	Multi-Sector	None	Conservation	489675	0.725821
Myanmar	Multi-Sector	None	Current PAs	43975	0.0651819
Montenegro	Multi-Sector	None	Crops, food	400	0.0286738
Montenegro	Multi-Sector	None	Crops, energy	250	0.0179211
Montenegro	Multi-Sector	None	Solar power	25	0.00179211
Montenegro	Multi-Sector	None	Hydropower	75	0.00537634
Montenegro	Multi-Sector	None	Solar power	100	0.00716846
Montenegro	Multi-Sector	None	Wind power	825	0.0591398
Montenegro	Multi-Sector	None	Conservation	10450	0.749104
Montenegro	Multi-Sector	None	Current PAs	1825	0.130824
Mongolia	Multi-Sector	None	Crops, food	115475	0.0727207
Mongolia	Multi-Sector	None	Crops, energy	37900	0.0238676
Mongolia	Multi-Sector	None	Hydropower	625	0.000393595
Mongolia	Multi-Sector	None	Solar power	102575	0.0645969
Mongolia	Multi-Sector	None	Wind power	202100	0.127273
Mongolia	Multi-Sector	None	Conservation	816650	0.514288
Mongolia	Multi-Sector	None	Current PAs	312600	0.196861
Mozambique	Multi-Sector	None	Crops, food	95850	0.119087
Mozambique	Multi-Sector	None	Crops, energy	2275	0.00282653
Mozambique	Multi-Sector	None	Solar power	450	0.000559093
Mozambique	Multi-Sector	None	Hydropower	350	0.00043485
Mozambique	Multi-Sector	None	Solar power	225	0.000279547
Mozambique	Multi-Sector	None	Wind power	5350	0.00664699
Mozambique	Multi-Sector	None	Conservation	462150	0.574189
Mozambique	Multi-Sector	None	Current PAs	237700	0.295325
Mauritania	Multi-Sector	None	Crops, food	9825	0.00930464
Mauritania	Multi-Sector	None	Crops, energy	225	0.000213083
Mauritania	Multi-Sector	None	Solar power	774950	0.733906
Mauritania	Multi-Sector	None	Wind power	1525	0.00144423
Mauritania	Multi-Sector	None	Conservation	263025	0.249094
Mauritania	Multi-Sector	None	Current PAs	6375	0.00603736
Malawi	Multi-Sector	None	Crops, food	34050	0.278927
Malawi	Multi-Sector	None	Crops, energy	825	0.00675814
Malawi	Multi-Sector	None	Hydropower	125	0.00102396
Malawi	Multi-Sector	None	Solar power	525	0.00430063
Malawi	Multi-Sector	None	Conservation	61175	0.501126
Malawi	Multi-Sector	None	Current PAs	25350	0.207659
Malaysia	Multi-Sector	None	Crops, food	40050	0.120108
Malaysia	Multi-Sector	None	Crops, energy	925	0.00277403
Malaysia	Multi-Sector	None	Solar power	1800	0.00539811
Malaysia	Multi-Sector	None	Hydropower	2350	0.00704753
Malaysia	Multi-Sector	None	Solar power	12175	0.0365122
Malaysia	Multi-Sector	None	Wind power	1850	0.00554806
Malaysia	Multi-Sector	None	Conservation	230800	0.692158
Malaysia	Multi-Sector	None	Current PAs	41900	0.125656
Namibia	Multi-Sector	None	Crops, food	32650	0.0388644
Namibia	Multi-Sector	None	Crops, energy	14375	0.0171111
Namibia	Multi-Sector	None	Solar power	82725	0.0984704
Namibia	Multi-Sector	None	Hydropower	100	0.000119033
Namibia	Multi-Sector	None	Solar power	2775	0.00330318
Namibia	Multi-Sector	None	Wind power	1175	0.00139864
Namibia	Multi-Sector	None	Conservation	388950	0.462981
Namibia	Multi-Sector	None	Current PAs	317350	0.377753
Niger	Multi-Sector	None	Crops, food	40075	0.0332221
Niger	Multi-Sector	None	Crops, energy	3075	0.00254917
Niger	Multi-Sector	None	Solar power	321825	0.266792
Niger	Multi-Sector	None	Solar power	36675	0.0304035
Niger	Multi-Sector	None	Wind power	22525	0.0186732
Niger	Multi-Sector	None	Conservation	416725	0.345464
Niger	Multi-Sector	None	Current PAs	224450	0.186069
Nigeria	Multi-Sector	None	Crops, food	352675	0.380017
Nigeria	Multi-Sector	None	Crops, energy	9225	0.0099402
Nigeria	Multi-Sector	None	Solar power	5500	0.0059264
Nigeria	Multi-Sector	None	Hydropower	1850	0.00199343
Nigeria	Multi-Sector	None	Solar power	5425	0.00584559
Nigeria	Multi-Sector	None	Wind power	6725	0.00724638
Nigeria	Multi-Sector	None	Conservation	416875	0.449195
Nigeria	Multi-Sector	None	Current PAs	122950	0.132482
Nicaragua	Multi-Sector	None	Crops, food	20550	0.156333
Nicaragua	Multi-Sector	None	Crops, energy	575	0.00437429
Nicaragua	Multi-Sector	None	Solar power	50	0.000380373
Nicaragua	Multi-Sector	None	Hydropower	325	0.00247242
Nicaragua	Multi-Sector	None	Solar power	125	0.000950932
Nicaragua	Multi-Sector	None	Wind power	525	0.00399391
Nicaragua	Multi-Sector	None	Conservation	82050	0.624192
Nicaragua	Multi-Sector	None	Current PAs	27225	0.207113
Netherlands	Multi-Sector	None	Crops, food	250	0.00658762
Netherlands	Multi-Sector	None	Crops, energy	1850	0.0487484
Netherlands	Multi-Sector	None	Hydropower	50	0.00131752
Netherlands	Multi-Sector	None	Wind power	6300	0.166008
Netherlands	Multi-Sector	None	Conservation	22150	0.583663
Netherlands	Multi-Sector	None	Current PAs	5925	0.156126
Norway	Multi-Sector	None	Crops, food	35300	0.0903507
Norway	Multi-Sector	None	Crops, energy	1500	0.00383926
Norway	Multi-Sector	None	Hydropower	17825	0.0456232
Norway	Multi-Sector	None	Solar power	2775	0.00710264
Norway	Multi-Sector	None	Wind power	7200	0.0184285
Norway	Multi-Sector	None	Conservation	209000	0.534937
Norway	Multi-Sector	None	Current PAs	97425	0.24936
Nepal	Multi-Sector	None	Crops, food	16425	0.109793
Nepal	Multi-Sector	None	Crops, energy	2050	0.0137032
Nepal	Multi-Sector	None	Solar power	100	0.000668449
Nepal	Multi-Sector	None	Hydropower	2900	0.019385
Nepal	Multi-Sector	None	Solar power	1750	0.0116979
Nepal	Multi-Sector	None	Conservation	93000	0.621658
Nepal	Multi-Sector	None	Current PAs	33275	0.222426
New Zealand	Multi-Sector	None	Solar power	10425	0.0383413
New Zealand	Multi-Sector	None	Hydropower	7575	0.0278595
New Zealand	Multi-Sector	None	Solar power	9800	0.0360427
New Zealand	Multi-Sector	None	Wind power	12800	0.0470761
New Zealand	Multi-Sector	None	Conservation	148050	0.544502
New Zealand	Multi-Sector	None	Current PAs	83150	0.305811
Oman	Multi-Sector	None	Crops, food	850	0.00267738
Oman	Multi-Sector	None	Crops, energy	475	0.00149618
Oman	Multi-Sector	None	Solar power	225900	0.711552
Oman	Multi-Sector	None	Solar power	14575	0.0459091
Oman	Multi-Sector	None	Wind power	5850	0.0184266
Oman	Multi-Sector	None	Conservation	58875	0.185448
Oman	Multi-Sector	None	Current PAs	10900	0.0343334
Pakistan	Multi-Sector	None	Crops, food	66975	0.075274
Pakistan	Multi-Sector	None	Crops, energy	60950	0.0685024
Pakistan	Multi-Sector	None	Solar power	169125	0.190081
Pakistan	Multi-Sector	None	Hydropower	3150	0.00354032
Pakistan	Multi-Sector	None	Solar power	31350	0.0352346
Pakistan	Multi-Sector	None	Wind power	30175	0.033914
Pakistan	Multi-Sector	None	Conservation	405150	0.455353
Pakistan	Multi-Sector	None	Current PAs	96625	0.108598
Panama	Multi-Sector	None	Crops, food	8650	0.115141
Panama	Multi-Sector	None	Crops, energy	175	0.00232945
Panama	Multi-Sector	None	Solar power	75	0.000998336
Panama	Multi-Sector	None	Hydropower	800	0.0106489
Panama	Multi-Sector	None	Solar power	425	0.00565724
Panama	Multi-Sector	None	Wind power	3250	0.0432612
Panama	Multi-Sector	None	Conservation	39375	0.524126
Panama	Multi-Sector	None	Current PAs	22350	0.297504
Peru	Multi-Sector	None	Crops, food	121200	0.0918652
Peru	Multi-Sector	None	Crops, energy	7100	0.00538154
Peru	Multi-Sector	None	Solar power	13600	0.0103083
Peru	Multi-Sector	None	Hydropower	13250	0.010043
Peru	Multi-Sector	None	Solar power	18450	0.0139844
Peru	Multi-Sector	None	Wind power	6000	0.00454778
Peru	Multi-Sector	None	Conservation	840175	0.636822
Peru	Multi-Sector	None	Current PAs	298975	0.226612
Philippines	Multi-Sector	None	Crops, food	71350	0.241373
Philippines	Multi-Sector	None	Crops, energy	5575	0.0188599
Philippines	Multi-Sector	None	Solar power	525	0.00177605
Philippines	Multi-Sector	None	Hydropower	3575	0.012094
Philippines	Multi-Sector	None	Solar power	4050	0.0137009
Philippines	Multi-Sector	None	Wind power	5475	0.0185217
Philippines	Multi-Sector	None	Conservation	156400	0.529093
Philippines	Multi-Sector	None	Current PAs	47775	0.16162
Papua New Guinea	Multi-Sector	None	Crops, food	44550	0.0942458
Papua New Guinea	Multi-Sector	None	Crops, energy	2550	0.00539454
Papua New Guinea	Multi-Sector	None	Hydropower	100	0.000211551
Papua New Guinea	Multi-Sector	None	Solar power	75	0.000158663
Papua New Guinea	Multi-Sector	None	Conservation	407825	0.862757
Papua New Guinea	Multi-Sector	None	Current PAs	17600	0.0372329
Poland	Multi-Sector	None	Crops, food	2800	0.00880711
Poland	Multi-Sector	None	Crops, energy	29650	0.093261
Poland	Multi-Sector	None	Hydropower	1825	0.00574035
Poland	Multi-Sector	None	Solar power	4925	0.0154911
Poland	Multi-Sector	None	Wind power	37675	0.118503
Poland	Multi-Sector	None	Conservation	117500	0.369584
Poland	Multi-Sector	None	Current PAs	122175	0.384289
North Korea	Multi-Sector	None	Crops, food	1175	0.00944534
North Korea	Multi-Sector	None	Crops, energy	4750	0.0381833
North Korea	Multi-Sector	None	Solar power	25	0.000200965
North Korea	Multi-Sector	None	Hydropower	9450	0.0759646
North Korea	Multi-Sector	None	Solar power	1225	0.00984727
North Korea	Multi-Sector	None	Wind power	11850	0.0952572
North Korea	Multi-Sector	None	Conservation	92850	0.746383
North Korea	Multi-Sector	None	Current PAs	2925	0.0235129
Portugal	Multi-Sector	None	Crops, food	500	0.00542005
Portugal	Multi-Sector	None	Crops, energy	1200	0.0130081
Portugal	Multi-Sector	None	Solar power	375	0.00406504
Portugal	Multi-Sector	None	Hydropower	6750	0.0731707
Portugal	Multi-Sector	None	Solar power	700	0.00758808
Portugal	Multi-Sector	None	Wind power	6775	0.0734417
Portugal	Multi-Sector	None	Conservation	55750	0.604336
Portugal	Multi-Sector	None	Current PAs	19650	0.213008
Paraguay	Multi-Sector	None	Crops, food	38350	0.0940297
Paraguay	Multi-Sector	None	Crops, energy	1775	0.00435209
Paraguay	Multi-Sector	None	Solar power	25	6.1297e-05
Paraguay	Multi-Sector	None	Hydropower	1425	0.00349393
Paraguay	Multi-Sector	None	Solar power	150	0.000367782
Paraguay	Multi-Sector	None	Wind power	625	0.00153243
Paraguay	Multi-Sector	None	Conservation	307500	0.753954
Paraguay	Multi-Sector	None	Current PAs	57750	0.141596
Qatar	Multi-Sector	None	Solar power	2375	0.209251
Qatar	Multi-Sector	None	Solar power	4425	0.389868
Qatar	Multi-Sector	None	Wind power	650	0.0572687
Qatar	Multi-Sector	None	Conservation	2425	0.213656
Qatar	Multi-Sector	None	Current PAs	1475	0.129956
Romania	Multi-Sector	None	Crops, food	1700	0.00707744
Romania	Multi-Sector	None	Crops, energy	20700	0.0861782
Romania	Multi-Sector	None	Hydropower	5550	0.0231057
Romania	Multi-Sector	None	Solar power	1675	0.00697336
Romania	Multi-Sector	None	Wind power	19850	0.0826395
Romania	Multi-Sector	None	Conservation	138825	0.577956
Romania	Multi-Sector	None	Current PAs	51100	0.212739
Russia	Multi-Sector	None	Crops, energy	149500	0.00871711
Russia	Multi-Sector	None	Solar power	81275	0.00473902
Russia	Multi-Sector	None	Hydropower	128175	0.00747368
Russia	Multi-Sector	None	Solar power	13375	0.000779875
Russia	Multi-Sector	None	Wind power	395625	0.0230683
Russia	Multi-Sector	None	Conservation	12466475	0.726901
Russia	Multi-Sector	None	Current PAs	1929850	0.112527
Rwanda	Multi-Sector	None	Crops, food	4000	0.154739
Rwanda	Multi-Sector	None	Crops, energy	475	0.0183752
Rwanda	Multi-Sector	None	Hydropower	1750	0.0676983
Rwanda	Multi-Sector	None	Solar power	100	0.00386847
Rwanda	Multi-Sector	None	Conservation	17100	0.661509
Rwanda	Multi-Sector	None	Current PAs	2375	0.0918762
Western Sahara	Multi-Sector	None	Solar power	8325	0.0895402
Western Sahara	Multi-Sector	None	Wind power	84550	0.909384
Western Sahara	Multi-Sector	None	Conservation	100	0.00107556
Saudi Arabia	Multi-Sector	None	Crops, food	34275	0.0174901
Saudi Arabia	Multi-Sector	None	Crops, energy	5175	0.00264074
Saudi Arabia	Multi-Sector	None	Solar power	913550	0.466174
Saudi Arabia	Multi-Sector	None	Solar power	201525	0.102836
Saudi Arabia	Multi-Sector	None	Wind power	324425	0.16555
Saudi Arabia	Multi-Sector	None	Conservation	255700	0.130481
Saudi Arabia	Multi-Sector	None	Current PAs	220450	0.112493
Sudan	Multi-Sector	None	Crops, food	84425	0.0444892
Sudan	Multi-Sector	None	Crops, energy	12525	0.00660027
Sudan	Multi-Sector	None	Solar power	843750	0.444629
Sudan	Multi-Sector	None	Hydropower	300	0.00015809
Sudan	Multi-Sector	None	Solar power	30850	0.0162569
Sudan	Multi-Sector	None	Wind power	7350	0.00387321
Sudan	Multi-Sector	None	Conservation	883725	0.465694
Sudan	Multi-Sector	None	Current PAs	34125	0.0179828
South Sudan	Multi-Sector	None	Crops, food	87100	0.137155
South Sudan	Multi-Sector	None	Crops, energy	275	0.000433037
South Sudan	Multi-Sector	None	Solar power	25	3.9367e-05
South Sudan	Multi-Sector	None	Solar power	25	3.9367e-05
South Sudan	Multi-Sector	None	Wind power	350	0.000551138
South Sudan	Multi-Sector	None	Conservation	441675	0.695496
South Sudan	Multi-Sector	None	Current PAs	105600	0.166286
Senegal	Multi-Sector	None	Crops, food	45800	0.22823
Senegal	Multi-Sector	None	Crops, energy	900	0.00448486
Senegal	Multi-Sector	None	Solar power	6475	0.0322661
Senegal	Multi-Sector	None	Solar power	100	0.000498318
Senegal	Multi-Sector	None	Wind power	25	0.00012458
Senegal	Multi-Sector	None	Conservation	94725	0.472032
Senegal	Multi-Sector	None	Current PAs	52525	0.261742
Solomon Islands	Multi-Sector	None	Solar power	2225	0.0849237
Solomon Islands	Multi-Sector	None	Conservation	23625	0.901718
Solomon Islands	Multi-Sector	None	Current PAs	350	0.0133588
Sierra Leone	Multi-Sector	None	Crops, food	27200	0.371585
Sierra Leone	Multi-Sector	None	Crops, energy	575	0.00785519
Sierra Leone	Multi-Sector	None	Hydropower	50	0.00068306
Sierra Leone	Multi-Sector	None	Solar power	50	0.00068306
Sierra Leone	Multi-Sector	None	Conservation	35250	0.481557
Sierra Leone	Multi-Sector	None	Current PAs	10075	0.137637
El Salvador	Multi-Sector	None	Crops, food	200	0.00966184
El Salvador	Multi-Sector	None	Crops, energy	1250	0.0603865
El Salvador	Multi-Sector	None	Solar power	25	0.00120773
El Salvador	Multi-Sector	None	Hydropower	325	0.0157005
El Salvador	Multi-Sector	None	Solar power	100	0.00483092
El Salvador	Multi-Sector	None	Wind power	1225	0.0591787
El Salvador	Multi-Sector	None	Conservation	16025	0.774155
El Salvador	Multi-Sector	None	Current PAs	1500	0.0724638
Somaliland	Multi-Sector	None	Crops, food	4200	0.0245112
Somaliland	Multi-Sector	None	Crops, energy	3700	0.0215932
Somaliland	Multi-Sector	None	Solar power	59000	0.344324
Somaliland	Multi-Sector	None	Wind power	175	0.0010213
Somaliland	Multi-Sector	None	Conservation	104150	0.60782
Somaliland	Multi-Sector	None	Current PAs	125	0.000729501
Somalia	Multi-Sector	None	Crops, food	31900	0.0661688
Somalia	Multi-Sector	None	Solar power	82500	0.171126
Somalia	Multi-Sector	None	Wind power	125	0.000259282
Somalia	Multi-Sector	None	Conservation	367300	0.761875
Somalia	Multi-Sector	None	Current PAs	100	0.000207426
Republic of Serbia	Multi-Sector	None	Crops, food	4825	0.0612893
Republic of Serbia	Multi-Sector	None	Crops, energy	8325	0.105748
Republic of Serbia	Multi-Sector	None	Hydropower	650	0.00825659
Republic of Serbia	Multi-Sector	None	Solar power	2800	0.0355668
Republic of Serbia	Multi-Sector	None	Wind power	4125	0.0523976
Republic of Serbia	Multi-Sector	None	Conservation	51400	0.652906
Republic of Serbia	Multi-Sector	None	Current PAs	6525	0.0828835
Suriname	Multi-Sector	None	Solar power	5775	0.0389676
Suriname	Multi-Sector	None	Hydropower	1750	0.0118084
Suriname	Multi-Sector	None	Solar power	7850	0.052969
Suriname	Multi-Sector	None	Conservation	111075	0.749494
Suriname	Multi-Sector	None	Current PAs	21700	0.146424
Slovakia	Multi-Sector	None	Crops, food	175	0.0035497
Slovakia	Multi-Sector	None	Crops, energy	2775	0.056288
Slovakia	Multi-Sector	None	Hydropower	500	0.010142
Slovakia	Multi-Sector	None	Solar power	1900	0.0385396
Slovakia	Multi-Sector	None	Wind power	5650	0.114604
Slovakia	Multi-Sector	None	Conservation	19950	0.404665
Slovakia	Multi-Sector	None	Current PAs	18175	0.368661
Slovenia	Multi-Sector	None	Crops, food	100	0.00490196
Slovenia	Multi-Sector	None	Crops, energy	1150	0.0563725
Slovenia	Multi-Sector	None	Hydropower	275	0.0134804
Slovenia	Multi-Sector	None	Solar power	375	0.0183824
Slovenia	Multi-Sector	None	Wind power	1050	0.0514706
Slovenia	Multi-Sector	None	Conservation	9850	0.482843
Slovenia	Multi-Sector	None	Current PAs	7600	0.372549
Sweden	Multi-Sector	None	Crops, food	13400	0.029692
Sweden	Multi-Sector	None	Crops, energy	1400	0.00310215
Sweden	Multi-Sector	None	Hydropower	6875	0.0152338
Sweden	Multi-Sector	None	Solar power	6250	0.0138489
Sweden	Multi-Sector	None	Wind power	23575	0.052238
Sweden	Multi-Sector	None	Conservation	343100	0.760248
Sweden	Multi-Sector	None	Current PAs	56575	0.12536
Syria	Multi-Sector	None	Crops, food	46225	0.244221
Syria	Multi-Sector	None	Crops, energy	1650	0.00871747
Syria	Multi-Sector	None	Solar power	68700	0.362964
Syria	Multi-Sector	None	Hydropower	10800	0.0570598
Syria	Multi-Sector	None	Solar power	475	0.00250958
Syria	Multi-Sector	None	Wind power	4575	0.0241712
Syria	Multi-Sector	None	Conservation	55225	0.291771
Syria	Multi-Sector	None	Current PAs	1275	0.00673623
Chad	Multi-Sector	None	Crops, food	95275	0.0736511
Chad	Multi-Sector	None	Crops, energy	3925	0.00303417
Chad	Multi-Sector	None	Solar power	159125	0.123009
Chad	Multi-Sector	None	Wind power	325775	0.251836
Chad	Multi-Sector	None	Conservation	422675	0.326743
Chad	Multi-Sector	None	Current PAs	264925	0.204797
Togo	Multi-Sector	None	Crops, food	6850	0.117951
Togo	Multi-Sector	None	Crops, energy	500	0.00860956
Togo	Multi-Sector	None	Solar power	50	0.000860956
Togo	Multi-Sector	None	Hydropower	2325	0.0400344
Togo	Multi-Sector	None	Solar power	75	0.00129143
Togo	Multi-Sector	None	Conservation	34100	0.587172
Togo	Multi-Sector	None	Current PAs	13950	0.240207
Thailand	Multi-Sector	None	Crops, food	140250	0.267398
Thailand	Multi-Sector	None	Crops, energy	21300	0.0406101
Thailand	Multi-Sector	None	Solar power	1975	0.00376549
Thailand	Multi-Sector	None	Hydropower	1200	0.00228789
Thailand	Multi-Sector	None	Solar power	24325	0.0463775
Thailand	Multi-Sector	None	Wind power	12975	0.0247378
Thailand	Multi-Sector	None	Conservation	216775	0.413298
Thailand	Multi-Sector	None	Current PAs	95475	0.182031
Tajikistan	Multi-Sector	None	Crops, energy	17125	0.118165
Tajikistan	Multi-Sector	None	Solar power	8250	0.056926
Tajikistan	Multi-Sector	None	Hydropower	2550	0.0175953
Tajikistan	Multi-Sector	None	Solar power	1875	0.0129377
Tajikistan	Multi-Sector	None	Wind power	400	0.00276005
Tajikistan	Multi-Sector	None	Conservation	82600	0.56995
Tajikistan	Multi-Sector	None	Current PAs	31900	0.220114
Turkmenistan	Multi-Sector	None	Crops, energy	21050	0.0439802
Turkmenistan	Multi-Sector	None	Solar power	289300	0.60444
Turkmenistan	Multi-Sector	None	Hydropower	25	5.2233e-05
Turkmenistan	Multi-Sector	None	Solar power	5425	0.0113346
Turkmenistan	Multi-Sector	None	Wind power	6225	0.013006
Turkmenistan	Multi-Sector	None	Conservation	141950	0.296579
Turkmenistan	Multi-Sector	None	Current PAs	14625	0.0305563
East Timor	Multi-Sector	None	Crops, food	2150	0.140523
East Timor	Multi-Sector	None	Crops, energy	1200	0.0784314
East Timor	Multi-Sector	None	Conservation	10000	0.653595
East Timor	Multi-Sector	None	Current PAs	1950	0.127451
Tunisia	Multi-Sector	None	Crops, food	26300	0.165097
Tunisia	Multi-Sector	None	Crops, energy	1225	0.00768989
Tunisia	Multi-Sector	None	Solar power	31300	0.196485
Tunisia	Multi-Sector	None	Hydropower	1450	0.00910232
Tunisia	Multi-Sector	None	Solar power	8000	0.0502197
Tunisia	Multi-Sector	None	Wind power	13325	0.0836472
Tunisia	Multi-Sector	None	Conservation	65525	0.411331
Tunisia	Multi-Sector	None	Current PAs	12050	0.0756434
Turkey	Multi-Sector	None	Crops, food	55875	0.0704137
Turkey	Multi-Sector	None	Crops, energy	65625	0.0827006
Turkey	Multi-Sector	None	Solar power	1450	0.00182729
Turkey	Multi-Sector	None	Solar power	7225	0.00910494
Turkey	Multi-Sector	None	Wind power	95425	0.120255
Turkey	Multi-Sector	None	Conservation	563800	0.710501
Turkey	Multi-Sector	None	Current PAs	1550	0.00195331
Taiwan	Multi-Sector	None	Crops, food	150	0.00407886
Taiwan	Multi-Sector	None	Crops, energy	75	0.00203943
Taiwan	Multi-Sector	None	Solar power	25	0.00067981
Taiwan	Multi-Sector	None	Wind power	625	0.0169952
Taiwan	Multi-Sector	None	Conservation	25350	0.689327
Taiwan	Multi-Sector	None	Current PAs	6975	0.189667
United Republic of Tanzania	Multi-Sector	None	Crops, food	142400	0.14781
United Republic of Tanzania	Multi-Sector	None	Crops, energy	3200	0.00332157
United Republic of Tanzania	Multi-Sector	None	Solar power	1075	0.00111584
United Republic of Tanzania	Multi-Sector	None	Hydropower	225	0.000233548
United Republic of Tanzania	Multi-Sector	None	Solar power	925	0.000960141
United Republic of Tanzania	Multi-Sector	None	Wind power	12050	0.0125078
United Republic of Tanzania	Multi-Sector	None	Conservation	434600	0.451111
United Republic of Tanzania	Multi-Sector	None	Current PAs	368675	0.382681
Uganda	Multi-Sector	None	Crops, food	80475	0.327001
Uganda	Multi-Sector	None	Crops, energy	1500	0.00609508
Uganda	Multi-Sector	None	Hydropower	575	0.00233645
Uganda	Multi-Sector	None	Solar power	550	0.00223486
Uganda	Multi-Sector	None	Conservation	125625	0.510463
Uganda	Multi-Sector	None	Current PAs	37100	0.150752
Ukraine	Multi-Sector	None	Crops, energy	183350	0.301786
Ukraine	Multi-Sector	None	Hydropower	16050	0.0264176
Ukraine	Multi-Sector	None	Solar power	1650	0.00271583
Ukraine	Multi-Sector	None	Wind power	35650	0.0586783
Ukraine	Multi-Sector	None	Conservation	301275	0.495885
Ukraine	Multi-Sector	None	Current PAs	68475	0.112707
Uruguay	Multi-Sector	None	Crops, food	6275	0.0346973
Uruguay	Multi-Sector	None	Crops, energy	2150	0.0118883
Uruguay	Multi-Sector	None	Solar power	75	0.000414708
Uruguay	Multi-Sector	None	Hydropower	8375	0.0463091
Uruguay	Multi-Sector	None	Solar power	400	0.00221178
Uruguay	Multi-Sector	None	Wind power	1350	0.00746475
Uruguay	Multi-Sector	None	Conservation	155800	0.861487
Uruguay	Multi-Sector	None	Current PAs	6350	0.035112
United States of America	Multi-Sector	None	Crops, food	1217075	0.126664
United States of America	Multi-Sector	None	Crops, energy	135175	0.0140679
United States of America	Multi-Sector	None	Solar power	158125	0.0164564
United States of America	Multi-Sector	None	Hydropower	57725	0.00600756
United States of America	Multi-Sector	None	Solar power	116025	0.012075
United States of America	Multi-Sector	None	Wind power	622000	0.0647328
United States of America	Multi-Sector	None	Conservation	5934625	0.617629
United States of America	Multi-Sector	None	Current PAs	1156050	0.120313
Uzbekistan	Multi-Sector	None	Crops, energy	22500	0.0493963
Uzbekistan	Multi-Sector	None	Solar power	185950	0.408233
Uzbekistan	Multi-Sector	None	Hydropower	1225	0.00268935
Uzbekistan	Multi-Sector	None	Solar power	1200	0.00263447
Uzbekistan	Multi-Sector	None	Wind power	12100	0.0265642
Uzbekistan	Multi-Sector	None	Conservation	174850	0.383864
Uzbekistan	Multi-Sector	None	Current PAs	43075	0.0945664
Venezuela	Multi-Sector	None	Crops, food	173850	0.18684
Venezuela	Multi-Sector	None	Crops, energy	10800	0.011607
Venezuela	Multi-Sector	None	Solar power	550	0.000591096
Venezuela	Multi-Sector	None	Hydropower	775	0.000832908
Venezuela	Multi-Sector	None	Solar power	2525	0.00271367
Venezuela	Multi-Sector	None	Wind power	10750	0.0115532
Venezuela	Multi-Sector	None	Conservation	204400	0.219673
Venezuela	Multi-Sector	None	Current PAs	526825	0.566189
Vietnam	Multi-Sector	None	Crops, food	35900	0.107188
Vietnam	Multi-Sector	None	Crops, energy	21650	0.0646413
Vietnam	Multi-Sector	None	Solar power	1550	0.0046279
Vietnam	Multi-Sector	None	Hydropower	13900	0.0415018
Vietnam	Multi-Sector	None	Solar power	14550	0.0434426
Vietnam	Multi-Sector	None	Wind power	875	0.00261253
Vietnam	Multi-Sector	None	Conservation	218125	0.651265
Vietnam	Multi-Sector	None	Current PAs	26150	0.0780772
Vanuatu	Multi-Sector	None	Solar power	1300	0.114035
Vanuatu	Multi-Sector	None	Conservation	9700	0.850877
Vanuatu	Multi-Sector	None	Current PAs	400	0.0350877
Yemen	Multi-Sector	None	Crops, food	15950	0.0345145
Yemen	Multi-Sector	None	Crops, energy	2425	0.0052475
Yemen	Multi-Sector	None	Solar power	180150	0.38983
Yemen	Multi-Sector	None	Solar power	54850	0.118691
Yemen	Multi-Sector	None	Wind power	9450	0.020449
Yemen	Multi-Sector	None	Conservation	195650	0.42337
Yemen	Multi-Sector	None	Current PAs	3350	0.00724912
South Africa	Multi-Sector	None	Crops, food	29175	0.0234629
South Africa	Multi-Sector	None	Crops, energy	3600	0.00289517
South Africa	Multi-Sector	None	Solar power	36325	0.0292131
South Africa	Multi-Sector	None	Hydropower	30550	0.0245687
South Africa	Multi-Sector	None	Solar power	6675	0.00536813
South Africa	Multi-Sector	None	Wind power	73950	0.0594716
South Africa	Multi-Sector	None	Conservation	951075	0.764868
South Africa	Multi-Sector	None	Current PAs	107850	0.0867345
Zambia	Multi-Sector	None	Crops, food	91775	0.119359
Zambia	Multi-Sector	None	Crops, energy	875	0.00113799
Zambia	Multi-Sector	None	Solar power	225	0.000292626
Zambia	Multi-Sector	None	Hydropower	75	9.75419e-05
Zambia	Multi-Sector	None	Solar power	450	0.000585252
Zambia	Multi-Sector	None	Wind power	6425	0.00835609
Zambia	Multi-Sector	None	Conservation	353800	0.460138
Zambia	Multi-Sector	None	Current PAs	314800	0.409416
Zimbabwe	Multi-Sector	None	Crops, food	63325	0.159318
Zimbabwe	Multi-Sector	None	Crops, energy	3300	0.00830241
Zimbabwe	Multi-Sector	None	Solar power	200	0.000503176
Zimbabwe	Multi-Sector	None	Hydropower	800	0.00201271
Zimbabwe	Multi-Sector	None	Solar power	325	0.000817661
Zimbabwe	Multi-Sector	None	Wind power	4250	0.0106925
Zimbabwe	Multi-Sector	None	Conservation	217225	0.546512
Zimbabwe	Multi-Sector	None	Current PAs	107800	0.271212
Afghanistan	Multi-Sector	30% of land	Crops, food	29425	0.0450251
Afghanistan	Multi-Sector	30% of land	Crops, energy	4125	0.00631192
Afghanistan	Multi-Sector	30% of land	Hydropower	25	3.82541e-05
Afghanistan	Multi-Sector	30% of land	Solar power	25	3.82541e-05
Afghanistan	Multi-Sector	30% of land	Conservation	172450	0.263877
Afghanistan	Multi-Sector	30% of land	Current PAs	23725	0.0363031
Angola	Multi-Sector	30% of land	Conservation	248450	0.195514
Angola	Multi-Sector	30% of land	Current PAs	135975	0.107004
Albania	Multi-Sector	30% of land	Crops, food	125	0.00433276
Albania	Multi-Sector	30% of land	Crops, energy	700	0.0242634
Albania	Multi-Sector	30% of land	Solar power	25	0.000866551
Albania	Multi-Sector	30% of land	Hydropower	25	0.000866551
Albania	Multi-Sector	30% of land	Solar power	100	0.0034662
Albania	Multi-Sector	30% of land	Wind power	2475	0.0857886
Albania	Multi-Sector	30% of land	Conservation	3925	0.136049
Albania	Multi-Sector	30% of land	Current PAs	4875	0.168977
Andorra	Multi-Sector	30% of land	Current PAs	25	1
United Arab Emirates	Multi-Sector	30% of land	Crops, food	175	0.00240798
United Arab Emirates	Multi-Sector	30% of land	Solar power	2975	0.0409357
United Arab Emirates	Multi-Sector	30% of land	Solar power	18000	0.247678
United Arab Emirates	Multi-Sector	30% of land	Wind power	775	0.0106639
United Arab Emirates	Multi-Sector	30% of land	Conservation	4975	0.0684555
United Arab Emirates	Multi-Sector	30% of land	Current PAs	13600	0.187135
Argentina	Multi-Sector	30% of land	Crops, food	5250	0.00185321
Argentina	Multi-Sector	30% of land	Crops, energy	14300	0.00504779
Argentina	Multi-Sector	30% of land	Solar power	300	0.000105898
Argentina	Multi-Sector	30% of land	Hydropower	950	0.000335342
Argentina	Multi-Sector	30% of land	Solar power	3075	0.00108545
Argentina	Multi-Sector	30% of land	Wind power	12025	0.00424473
Argentina	Multi-Sector	30% of land	Conservation	613050	0.216402
Argentina	Multi-Sector	30% of land	Current PAs	241675	0.0853094
Armenia	Multi-Sector	30% of land	Crops, energy	375	0.0124275
Armenia	Multi-Sector	30% of land	Solar power	25	0.0008285
Armenia	Multi-Sector	30% of land	Hydropower	575	0.0190555
Armenia	Multi-Sector	30% of land	Solar power	50	0.001657
Armenia	Multi-Sector	30% of land	Wind power	2525	0.0836785
Armenia	Multi-Sector	30% of land	Conservation	1525	0.0505385
Armenia	Multi-Sector	30% of land	Current PAs	7550	0.250207
Australia	Multi-Sector	30% of land	Crops, food	17750	0.00226312
Australia	Multi-Sector	30% of land	Crops, energy	37875	0.00482905
Australia	Multi-Sector	30% of land	Solar power	1450	0.000184875
Australia	Multi-Sector	30% of land	Hydropower	1575	0.000200812
Australia	Multi-Sector	30% of land	Solar power	9400	0.0011985
Australia	Multi-Sector	30% of land	Wind power	39025	0.00497568
Australia	Multi-Sector	30% of land	Conservation	821100	0.10469
Australia	Multi-Sector	30% of land	Current PAs	1559475	0.198833
Austria	Multi-Sector	30% of land	Crops, food	225	0.00263158
Austria	Multi-Sector	30% of land	Crops, energy	2450	0.028655
Austria	Multi-Sector	30% of land	Hydropower	3800	0.0444444
Austria	Multi-Sector	30% of land	Solar power	5525	0.0646199
Austria	Multi-Sector	30% of land	Wind power	18125	0.211988
Austria	Multi-Sector	30% of land	Conservation	2100	0.0245614
Austria	Multi-Sector	30% of land	Current PAs	23700	0.277193
Azerbaijan	Multi-Sector	30% of land	Crops, energy	1000	0.0113636
Azerbaijan	Multi-Sector	30% of land	Solar power	25	0.000284091
Azerbaijan	Multi-Sector	30% of land	Hydropower	300	0.00340909
Azerbaijan	Multi-Sector	30% of land	Solar power	425	0.00482955
Azerbaijan	Multi-Sector	30% of land	Wind power	2875	0.0326705
Azerbaijan	Multi-Sector	30% of land	Conservation	18875	0.214489
Azerbaijan	Multi-Sector	30% of land	Current PAs	7575	0.0860795
Burundi	Multi-Sector	30% of land	Crops, food	5375	0.193519
Burundi	Multi-Sector	30% of land	Crops, energy	725	0.0261026
Burundi	Multi-Sector	30% of land	Hydropower	225	0.00810081
Burundi	Multi-Sector	30% of land	Solar power	50	0.00180018
Burundi	Multi-Sector	30% of land	Conservation	6475	0.233123
Burundi	Multi-Sector	30% of land	Current PAs	1875	0.0675068
Belgium	Multi-Sector	30% of land	Crops, food	200	0.0064
Belgium	Multi-Sector	30% of land	Crops, energy	1575	0.0504
Belgium	Multi-Sector	30% of land	Solar power	25	0.0008
Belgium	Multi-Sector	30% of land	Hydropower	350	0.0112
Belgium	Multi-Sector	30% of land	Solar power	10425	0.3336
Belgium	Multi-Sector	30% of land	Wind power	2950	0.0944
Belgium	Multi-Sector	30% of land	Conservation	6625	0.212
Belgium	Multi-Sector	30% of land	Current PAs	2775	0.0888
Benin	Multi-Sector	30% of land	Crops, food	1375	0.0115741
Benin	Multi-Sector	30% of land	Crops, energy	250	0.00210438
Benin	Multi-Sector	30% of land	Solar power	75	0.000631313
Benin	Multi-Sector	30% of land	Hydropower	25	0.000210438
Benin	Multi-Sector	30% of land	Solar power	100	0.000841751
Benin	Multi-Sector	30% of land	Conservation	2250	0.0189394
Benin	Multi-Sector	30% of land	Current PAs	33550	0.282407
Burkina Faso	Multi-Sector	30% of land	Crops, food	12000	0.0431189
Burkina Faso	Multi-Sector	30% of land	Crops, energy	2325	0.00835429
Burkina Faso	Multi-Sector	30% of land	Hydropower	600	0.00215595
Burkina Faso	Multi-Sector	30% of land	Solar power	300	0.00107797
Burkina Faso	Multi-Sector	30% of land	Conservation	37825	0.135914
Burkina Faso	Multi-Sector	30% of land	Current PAs	46200	0.166008
Bangladesh	Multi-Sector	30% of land	Crops, food	2775	0.0201269
Bangladesh	Multi-Sector	30% of land	Crops, energy	1375	0.0099728
Bangladesh	Multi-Sector	30% of land	Solar power	475	0.00344515
Bangladesh	Multi-Sector	30% of land	Hydropower	25	0.000181324
Bangladesh	Multi-Sector	30% of land	Solar power	8275	0.0600181
Bangladesh	Multi-Sector	30% of land	Conservation	36325	0.263463
Bangladesh	Multi-Sector	30% of land	Current PAs	5675	0.0411605
Bulgaria	Multi-Sector	30% of land	Crops, food	600	0.0052459
Bulgaria	Multi-Sector	30% of land	Crops, energy	5900	0.0515847
Bulgaria	Multi-Sector	30% of land	Hydropower	1875	0.0163934
Bulgaria	Multi-Sector	30% of land	Solar power	700	0.00612022
Bulgaria	Multi-Sector	30% of land	Wind power	8350	0.0730055
Bulgaria	Multi-Sector	30% of land	Current PAs	45600	0.398689
The Bahamas	Multi-Sector	30% of land	Crops, food	25	0.00191571
The Bahamas	Multi-Sector	30% of land	Solar power	25	0.00191571
The Bahamas	Multi-Sector	30% of land	Current PAs	4500	0.344828
Bosnia and Herzegovina	Multi-Sector	30% of land	Crops, food	150	0.0028463
Bosnia and Herzegovina	Multi-Sector	30% of land	Crops, energy	1675	0.0317837
Bosnia and Herzegovina	Multi-Sector	30% of land	Solar power	25	0.000474383
Bosnia and Herzegovina	Multi-Sector	30% of land	Hydropower	100	0.00189753
Bosnia and Herzegovina	Multi-Sector	30% of land	Solar power	425	0.00806452
Bosnia and Herzegovina	Multi-Sector	30% of land	Wind power	2075	0.0393738
Bosnia and Herzegovina	Multi-Sector	30% of land	Conservation	13750	0.260911
Bosnia and Herzegovina	Multi-Sector	30% of land	Current PAs	2325	0.0441176
Belarus	Multi-Sector	30% of land	Crops, energy	500	0.00237614
Belarus	Multi-Sector	30% of land	Hydropower	75	0.000356422
Belarus	Multi-Sector	30% of land	Solar power	1375	0.00653439
Belarus	Multi-Sector	30% of land	Wind power	10600	0.0503742
Belarus	Multi-Sector	30% of land	Conservation	36525	0.173577
Belarus	Multi-Sector	30% of land	Current PAs	27400	0.130213
Belize	Multi-Sector	30% of land	Crops, food	50	0.0021645
Belize	Multi-Sector	30% of land	Crops, energy	100	0.004329
Belize	Multi-Sector	30% of land	Hydropower	25	0.00108225
Belize	Multi-Sector	30% of land	Solar power	25	0.00108225
Belize	Multi-Sector	30% of land	Current PAs	8600	0.372294
Bolivia	Multi-Sector	30% of land	Crops, food	275	0.000247748
Bolivia	Multi-Sector	30% of land	Crops, energy	550	0.000495495
Bolivia	Multi-Sector	30% of land	Solar power	25	2.25225e-05
Bolivia	Multi-Sector	30% of land	Hydropower	25	2.25225e-05
Bolivia	Multi-Sector	30% of land	Solar power	500	0.00045045
Bolivia	Multi-Sector	30% of land	Wind power	1275	0.00114865
Bolivia	Multi-Sector	30% of land	Current PAs	336750	0.303378
Brazil	Multi-Sector	30% of land	Crops, food	23400	0.00270488
Brazil	Multi-Sector	30% of land	Crops, energy	59350	0.00686046
Brazil	Multi-Sector	30% of land	Solar power	1675	0.000193619
Brazil	Multi-Sector	30% of land	Hydropower	3100	0.000358339
Brazil	Multi-Sector	30% of land	Solar power	16700	0.00193041
Brazil	Multi-Sector	30% of land	Wind power	76475	0.00883999
Brazil	Multi-Sector	30% of land	Current PAs	2612450	0.301982
Bhutan	Multi-Sector	30% of land	Crops, food	25	0.000616143
Bhutan	Multi-Sector	30% of land	Crops, energy	25	0.000616143
Bhutan	Multi-Sector	30% of land	Hydropower	150	0.00369686
Bhutan	Multi-Sector	30% of land	Current PAs	19700	0.485521
Botswana	Multi-Sector	30% of land	Crops, food	1875	0.00317474
Botswana	Multi-Sector	30% of land	Crops, energy	250	0.000423298
Botswana	Multi-Sector	30% of land	Solar power	50	8.46597e-05
Botswana	Multi-Sector	30% of land	Solar power	125	0.000211649
Botswana	Multi-Sector	30% of land	Wind power	1450	0.00245513
Botswana	Multi-Sector	30% of land	Conservation	2975	0.00503725
Botswana	Multi-Sector	30% of land	Current PAs	174300	0.295124
Central African Republic	Multi-Sector	30% of land	Crops, food	175	0.000276855
Central African Republic	Multi-Sector	30% of land	Crops, energy	50	7.91014e-05
Central African Republic	Multi-Sector	30% of land	Hydropower	25	3.95507e-05
Central African Republic	Multi-Sector	30% of land	Conservation	77400	0.122449
Central African Republic	Multi-Sector	30% of land	Current PAs	114050	0.18043
Canada	Multi-Sector	30% of land	Crops, food	6225	0.000619628
Canada	Multi-Sector	30% of land	Crops, energy	59025	0.00587527
Canada	Multi-Sector	30% of land	Hydropower	825	8.21194e-05
Canada	Multi-Sector	30% of land	Solar power	9775	0.00097299
Canada	Multi-Sector	30% of land	Wind power	74600	0.00742558
Canada	Multi-Sector	30% of land	Conservation	1753825	0.174573
Canada	Multi-Sector	30% of land	Current PAs	1304900	0.129888
Switzerland	Multi-Sector	30% of land	Crops, food	550	0.0130564
Switzerland	Multi-Sector	30% of land	Crops, energy	5450	0.129377
Switzerland	Multi-Sector	30% of land	Hydropower	2075	0.0492582
Switzerland	Multi-Sector	30% of land	Solar power	2750	0.0652819
Switzerland	Multi-Sector	30% of land	Wind power	1625	0.0385757
Switzerland	Multi-Sector	30% of land	Conservation	9200	0.218398
Switzerland	Multi-Sector	30% of land	Current PAs	3575	0.0848665
Chile	Multi-Sector	30% of land	Crops, food	625	0.000832639
Chile	Multi-Sector	30% of land	Crops, energy	1375	0.00183181
Chile	Multi-Sector	30% of land	Solar power	200	0.000266445
Chile	Multi-Sector	30% of land	Hydropower	950	0.00126561
Chile	Multi-Sector	30% of land	Solar power	1750	0.00233139
Chile	Multi-Sector	30% of land	Wind power	6525	0.00869276
Chile	Multi-Sector	30% of land	Conservation	75400	0.10045
Chile	Multi-Sector	30% of land	Current PAs	150675	0.200733
China	Multi-Sector	30% of land	Crops, food	140675	0.0147473
China	Multi-Sector	30% of land	Crops, energy	156100	0.0163643
China	Multi-Sector	30% of land	Solar power	20800	0.00218051
China	Multi-Sector	30% of land	Hydropower	5525	0.000579198
China	Multi-Sector	30% of land	Solar power	133450	0.0139899
China	Multi-Sector	30% of land	Wind power	1051300	0.11021
China	Multi-Sector	30% of land	Conservation	2734550	0.286669
China	Multi-Sector	30% of land	Current PAs	164400	0.0172344
Ivory Coast	Multi-Sector	30% of land	Crops, food	4775	0.0145624
Ivory Coast	Multi-Sector	30% of land	Crops, energy	975	0.00297347
Ivory Coast	Multi-Sector	30% of land	Solar power	150	0.000457457
Ivory Coast	Multi-Sector	30% of land	Hydropower	700	0.0021348
Ivory Coast	Multi-Sector	30% of land	Solar power	175	0.000533699
Ivory Coast	Multi-Sector	30% of land	Conservation	24500	0.0747179
Ivory Coast	Multi-Sector	30% of land	Current PAs	74400	0.226898
Cameroon	Multi-Sector	30% of land	Crops, food	2625	0.0055409
Cameroon	Multi-Sector	30% of land	Crops, energy	525	0.00110818
Cameroon	Multi-Sector	30% of land	Solar power	100	0.000211082
Cameroon	Multi-Sector	30% of land	Hydropower	75	0.000158311
Cameroon	Multi-Sector	30% of land	Solar power	175	0.000369393
Cameroon	Multi-Sector	30% of land	Wind power	2875	0.0060686
Cameroon	Multi-Sector	30% of land	Conservation	91175	0.192454
Cameroon	Multi-Sector	30% of land	Current PAs	53475	0.112876
Democratic Republic of the Congo	Multi-Sector	30% of land	Crops, food	6750	0.00284022
Democratic Republic of the Congo	Multi-Sector	30% of land	Crops, energy	1425	0.000599602
Democratic Republic of the Congo	Multi-Sector	30% of land	Solar power	350	0.000147271
Democratic Republic of the Congo	Multi-Sector	30% of land	Hydropower	25	1.05193e-05
Democratic Republic of the Congo	Multi-Sector	30% of land	Solar power	725	0.000305061
Democratic Republic of the Congo	Multi-Sector	30% of land	Wind power	10850	0.00456539
Democratic Republic of the Congo	Multi-Sector	30% of land	Conservation	384575	0.161819
Democratic Republic of the Congo	Multi-Sector	30% of land	Current PAs	328475	0.138214
Republic of Congo	Multi-Sector	30% of land	Crops, food	1025	0.00290122
Republic of Congo	Multi-Sector	30% of land	Crops, energy	225	0.000636853
Republic of Congo	Multi-Sector	30% of land	Hydropower	25	7.07614e-05
Republic of Congo	Multi-Sector	30% of land	Solar power	50	0.000141523
Republic of Congo	Multi-Sector	30% of land	Current PAs	130675	0.36987
Colombia	Multi-Sector	30% of land	Crops, food	2075	0.00178825
Colombia	Multi-Sector	30% of land	Crops, energy	3850	0.00331796
Colombia	Multi-Sector	30% of land	Solar power	225	0.000193907
Colombia	Multi-Sector	30% of land	Hydropower	125	0.000107726
Colombia	Multi-Sector	30% of land	Solar power	1825	0.0015728
Colombia	Multi-Sector	30% of land	Wind power	6000	0.00517085
Colombia	Multi-Sector	30% of land	Conservation	48600	0.0418839
Colombia	Multi-Sector	30% of land	Current PAs	305100	0.262938
Costa Rica	Multi-Sector	30% of land	Crops, food	150	0.00285714
Costa Rica	Multi-Sector	30% of land	Crops, energy	250	0.0047619
Costa Rica	Multi-Sector	30% of land	Solar power	25	0.00047619
Costa Rica	Multi-Sector	30% of land	Hydropower	250	0.0047619
Costa Rica	Multi-Sector	30% of land	Solar power	150	0.00285714
Costa Rica	Multi-Sector	30% of land	Wind power	500	0.00952381
Costa Rica	Multi-Sector	30% of land	Conservation	2400	0.0457143
Costa Rica	Multi-Sector	30% of land	Current PAs	13450	0.25619
Cuba	Multi-Sector	30% of land	Crops, food	1350	0.0121348
Cuba	Multi-Sector	30% of land	Crops, energy	5050	0.0453933
Cuba	Multi-Sector	30% of land	Solar power	75	0.000674157
Cuba	Multi-Sector	30% of land	Hydropower	825	0.00741573
Cuba	Multi-Sector	30% of land	Solar power	625	0.00561798
Cuba	Multi-Sector	30% of land	Wind power	3250	0.0292135
Cuba	Multi-Sector	30% of land	Conservation	17250	0.155056
Cuba	Multi-Sector	30% of land	Current PAs	16175	0.145393
Czech Republic	Multi-Sector	30% of land	Crops, food	375	0.00469631
Czech Republic	Multi-Sector	30% of land	Crops, energy	3700	0.0463369
Czech Republic	Multi-Sector	30% of land	Hydropower	2550	0.0319349
Czech Republic	Multi-Sector	30% of land	Solar power	5400	0.0676268
Czech Republic	Multi-Sector	30% of land	Wind power	15450	0.193488
Czech Republic	Multi-Sector	30% of land	Conservation	8025	0.100501
Czech Republic	Multi-Sector	30% of land	Current PAs	16200	0.20288
Germany	Multi-Sector	30% of land	Crops, food	2725	0.00751932
Germany	Multi-Sector	30% of land	Crops, energy	25775	0.0711231
Germany	Multi-Sector	30% of land	Hydropower	7200	0.0198675
Germany	Multi-Sector	30% of land	Solar power	25200	0.0695364
Germany	Multi-Sector	30% of land	Wind power	88725	0.244826
Germany	Multi-Sector	30% of land	Current PAs	124800	0.344371
Djibouti	Multi-Sector	30% of land	Wind power	1000	0.0453001
Djibouti	Multi-Sector	30% of land	Conservation	6225	0.281993
Djibouti	Multi-Sector	30% of land	Current PAs	125	0.00566251
Denmark	Multi-Sector	30% of land	Crops, food	350	0.00813481
Denmark	Multi-Sector	30% of land	Crops, energy	3775	0.0877397
Denmark	Multi-Sector	30% of land	Solar power	2050	0.0476467
Denmark	Multi-Sector	30% of land	Wind power	4100	0.0952934
Denmark	Multi-Sector	30% of land	Conservation	9725	0.226031
Denmark	Multi-Sector	30% of land	Current PAs	3450	0.0801859
Dominican Republic	Multi-Sector	30% of land	Crops, food	600	0.0121396
Dominican Republic	Multi-Sector	30% of land	Crops, energy	1775	0.035913
Dominican Republic	Multi-Sector	30% of land	Solar power	50	0.00101163
Dominican Republic	Multi-Sector	30% of land	Hydropower	2750	0.0556399
Dominican Republic	Multi-Sector	30% of land	Solar power	550	0.011128
Dominican Republic	Multi-Sector	30% of land	Wind power	1175	0.0237734
Dominican Republic	Multi-Sector	30% of land	Conservation	2700	0.0546282
Dominican Republic	Multi-Sector	30% of land	Current PAs	12250	0.24785
Algeria	Multi-Sector	30% of land	Crops, food	105300	0.0445356
Algeria	Multi-Sector	30% of land	Crops, energy	5250	0.00222044
Algeria	Multi-Sector	30% of land	Solar power	825	0.000348926
Algeria	Multi-Sector	30% of land	Hydropower	775	0.000327779
Algeria	Multi-Sector	30% of land	Solar power	1825	0.000771866
Algeria	Multi-Sector	30% of land	Wind power	25750	0.0108907
Algeria	Multi-Sector	30% of land	Current PAs	1288575	0.54499
Ecuador	Multi-Sector	30% of land	Crops, food	700	0.00269179
Ecuador	Multi-Sector	30% of land	Crops, energy	1450	0.00557585
Ecuador	Multi-Sector	30% of land	Solar power	125	0.000480677
Ecuador	Multi-Sector	30% of land	Hydropower	450	0.00173044
Ecuador	Multi-Sector	30% of land	Solar power	1100	0.00422996
Ecuador	Multi-Sector	30% of land	Wind power	8475	0.0325899
Ecuador	Multi-Sector	30% of land	Conservation	19225	0.0739281
Ecuador	Multi-Sector	30% of land	Current PAs	59150	0.227456
Egypt	Multi-Sector	30% of land	Conservation	67650	0.0662992
Egypt	Multi-Sector	30% of land	Current PAs	131525	0.128899
Eritrea	Multi-Sector	30% of land	Crops, food	3150	0.0250199
Eritrea	Multi-Sector	30% of land	Crops, energy	450	0.00357427
Eritrea	Multi-Sector	30% of land	Solar power	25	0.00019857
Eritrea	Multi-Sector	30% of land	Solar power	25	0.00019857
Eritrea	Multi-Sector	30% of land	Wind power	150	0.00119142
Eritrea	Multi-Sector	30% of land	Conservation	37700	0.299444
Eritrea	Multi-Sector	30% of land	Current PAs	75	0.000595711
Spain	Multi-Sector	30% of land	Crops, food	6050	0.0117402
Spain	Multi-Sector	30% of land	Crops, energy	16575	0.0321642
Spain	Multi-Sector	30% of land	Solar power	700	0.00135837
Spain	Multi-Sector	30% of land	Hydropower	8350	0.0162034
Spain	Multi-Sector	30% of land	Solar power	4300	0.00834425
Spain	Multi-Sector	30% of land	Wind power	36775	0.0713627
Spain	Multi-Sector	30% of land	Conservation	18100	0.0351235
Spain	Multi-Sector	30% of land	Current PAs	137500	0.266822
Estonia	Multi-Sector	30% of land	Crops, food	50	0.00107817
Estonia	Multi-Sector	30% of land	Crops, energy	625	0.0134771
Estonia	Multi-Sector	30% of land	Hydropower	25	0.000539084
Estonia	Multi-Sector	30% of land	Solar power	425	0.00916442
Estonia	Multi-Sector	30% of land	Wind power	1275	0.0274933
Estonia	Multi-Sector	30% of land	Conservation	6875	0.148248
Estonia	Multi-Sector	30% of land	Current PAs	7125	0.153639
Ethiopia	Multi-Sector	30% of land	Crops, food	13100	0.0113676
Ethiopia	Multi-Sector	30% of land	Crops, energy	1600	0.00138841
Ethiopia	Multi-Sector	30% of land	Solar power	325	0.00028202
Ethiopia	Multi-Sector	30% of land	Hydropower	875	0.000759285
Ethiopia	Multi-Sector	30% of land	Solar power	675	0.000585734
Ethiopia	Multi-Sector	30% of land	Wind power	7500	0.00650816
Ethiopia	Multi-Sector	30% of land	Conservation	151075	0.131096
Ethiopia	Multi-Sector	30% of land	Current PAs	196325	0.170362
Finland	Multi-Sector	30% of land	Crops, food	25	7.4355e-05
Finland	Multi-Sector	30% of land	Crops, energy	375	0.00111532
Finland	Multi-Sector	30% of land	Hydropower	325	0.000966615
Finland	Multi-Sector	30% of land	Solar power	400	0.00118968
Finland	Multi-Sector	30% of land	Wind power	16200	0.048182
Finland	Multi-Sector	30% of land	Conservation	64925	0.1931
Finland	Multi-Sector	30% of land	Current PAs	37275	0.110863
Fiji	Multi-Sector	30% of land	Crops, food	250	0.0133333
Fiji	Multi-Sector	30% of land	Hydropower	100	0.00533333
Fiji	Multi-Sector	30% of land	Solar power	25	0.00133333
Fiji	Multi-Sector	30% of land	Conservation	5175	0.276
Fiji	Multi-Sector	30% of land	Current PAs	550	0.0293333
France	Multi-Sector	30% of land	Crops, food	3975	0.00618605
France	Multi-Sector	30% of land	Crops, energy	34775	0.0541182
France	Multi-Sector	30% of land	Solar power	1425	0.00221764
France	Multi-Sector	30% of land	Hydropower	10175	0.0158347
France	Multi-Sector	30% of land	Solar power	10375	0.016146
France	Multi-Sector	30% of land	Wind power	69475	0.10812
France	Multi-Sector	30% of land	Conservation	17925	0.0278956
France	Multi-Sector	30% of land	Current PAs	195025	0.303505
Gabon	Multi-Sector	30% of land	Crops, food	200	0.000753793
Gabon	Multi-Sector	30% of land	Crops, energy	25	9.42241e-05
Gabon	Multi-Sector	30% of land	Hydropower	50	0.000188448
Gabon	Multi-Sector	30% of land	Solar power	550	0.00207293
Gabon	Multi-Sector	30% of land	Conservation	22350	0.0842363
Gabon	Multi-Sector	30% of land	Current PAs	59500	0.224253
United Kingdom	Multi-Sector	30% of land	Crops, food	800	0.00328037
United Kingdom	Multi-Sector	30% of land	Crops, energy	4525	0.0185546
United Kingdom	Multi-Sector	30% of land	Hydropower	4200	0.0172219
United Kingdom	Multi-Sector	30% of land	Solar power	27350	0.112148
United Kingdom	Multi-Sector	30% of land	Wind power	19650	0.0805741
United Kingdom	Multi-Sector	30% of land	Conservation	10925	0.0447975
United Kingdom	Multi-Sector	30% of land	Current PAs	62275	0.255356
Georgia	Multi-Sector	30% of land	Crops, energy	275	0.00389794
Georgia	Multi-Sector	30% of land	Hydropower	500	0.00708717
Georgia	Multi-Sector	30% of land	Solar power	50	0.000708717
Georgia	Multi-Sector	30% of land	Wind power	1525	0.0216159
Georgia	Multi-Sector	30% of land	Conservation	14200	0.201276
Georgia	Multi-Sector	30% of land	Current PAs	7125	0.100992
Ghana	Multi-Sector	30% of land	Crops, food	5275	0.021641
Ghana	Multi-Sector	30% of land	Crops, energy	950	0.00389744
Ghana	Multi-Sector	30% of land	Solar power	175	0.000717949
Ghana	Multi-Sector	30% of land	Hydropower	5875	0.0241026
Ghana	Multi-Sector	30% of land	Solar power	250	0.00102564
Ghana	Multi-Sector	30% of land	Wind power	225	0.000923077
Ghana	Multi-Sector	30% of land	Conservation	38775	0.159077
Ghana	Multi-Sector	30% of land	Current PAs	34675	0.142256
Guinea	Multi-Sector	30% of land	Crops, food	1925	0.00772394
Guinea	Multi-Sector	30% of land	Crops, energy	425	0.00170529
Guinea	Multi-Sector	30% of land	Hydropower	575	0.00230715
Guinea	Multi-Sector	30% of land	Solar power	25	0.000100311
Guinea	Multi-Sector	30% of land	Current PAs	90225	0.362022
Gambia	Multi-Sector	30% of land	Crops, food	650	0.0610329
Gambia	Multi-Sector	30% of land	Crops, energy	100	0.00938967
Gambia	Multi-Sector	30% of land	Solar power	25	0.00234742
Gambia	Multi-Sector	30% of land	Conservation	2575	0.241784
Gambia	Multi-Sector	30% of land	Current PAs	675	0.0633803
Guinea Bissau	Multi-Sector	30% of land	Crops, food	250	0.00766284
Guinea Bissau	Multi-Sector	30% of land	Crops, energy	75	0.00229885
Guinea Bissau	Multi-Sector	30% of land	Solar power	25	0.000766284
Guinea Bissau	Multi-Sector	30% of land	Conservation	2025	0.062069
Guinea Bissau	Multi-Sector	30% of land	Current PAs	7825	0.239847
Equatorial Guinea	Multi-Sector	30% of land	Crops, food	175	0.00641026
Equatorial Guinea	Multi-Sector	30% of land	Crops, energy	25	0.000915751
Equatorial Guinea	Multi-Sector	30% of land	Hydropower	50	0.0018315
Equatorial Guinea	Multi-Sector	30% of land	Conservation	3275	0.119963
Equatorial Guinea	Multi-Sector	30% of land	Current PAs	5050	0.184982
Greece	Multi-Sector	30% of land	Crops, food	350	0.00264851
Greece	Multi-Sector	30% of land	Crops, energy	1500	0.0113507
Greece	Multi-Sector	30% of land	Solar power	300	0.00227015
Greece	Multi-Sector	30% of land	Hydropower	1575	0.0119183
Greece	Multi-Sector	30% of land	Solar power	675	0.00510783
Greece	Multi-Sector	30% of land	Wind power	20825	0.157586
Greece	Multi-Sector	30% of land	Current PAs	42425	0.321037
Guatemala	Multi-Sector	30% of land	Crops, food	325	0.00293321
Guatemala	Multi-Sector	30% of land	Crops, energy	750	0.00676895
Guatemala	Multi-Sector	30% of land	Solar power	50	0.000451264
Guatemala	Multi-Sector	30% of land	Hydropower	50	0.000451264
Guatemala	Multi-Sector	30% of land	Solar power	250	0.00225632
Guatemala	Multi-Sector	30% of land	Wind power	1425	0.012861
Guatemala	Multi-Sector	30% of land	Conservation	12325	0.111236
Guatemala	Multi-Sector	30% of land	Current PAs	21200	0.191336
Guyana	Multi-Sector	30% of land	Crops, food	25	0.000115915
Guyana	Multi-Sector	30% of land	Crops, energy	25	0.000115915
Guyana	Multi-Sector	30% of land	Hydropower	25	0.000115915
Guyana	Multi-Sector	30% of land	Solar power	25	0.000115915
Guyana	Multi-Sector	30% of land	Conservation	47175	0.218732
Guyana	Multi-Sector	30% of land	Current PAs	18675	0.0865886
Honduras	Multi-Sector	30% of land	Crops, food	150	0.00129702
Honduras	Multi-Sector	30% of land	Crops, energy	325	0.0028102
Honduras	Multi-Sector	30% of land	Solar power	25	0.000216169
Honduras	Multi-Sector	30% of land	Hydropower	300	0.00259403
Honduras	Multi-Sector	30% of land	Solar power	200	0.00172936
Honduras	Multi-Sector	30% of land	Wind power	1300	0.0112408
Honduras	Multi-Sector	30% of land	Conservation	8275	0.0715521
Honduras	Multi-Sector	30% of land	Current PAs	26450	0.228707
Croatia	Multi-Sector	30% of land	Crops, food	375	0.00678426
Croatia	Multi-Sector	30% of land	Crops, energy	4275	0.0773406
Croatia	Multi-Sector	30% of land	Solar power	75	0.00135685
Croatia	Multi-Sector	30% of land	Hydropower	75	0.00135685
Croatia	Multi-Sector	30% of land	Solar power	1750	0.0316599
Croatia	Multi-Sector	30% of land	Wind power	1550	0.0280416
Croatia	Multi-Sector	30% of land	Current PAs	19625	0.355043
Haiti	Multi-Sector	30% of land	Crops, food	150	0.00548948
Haiti	Multi-Sector	30% of land	Crops, energy	350	0.0128088
Haiti	Multi-Sector	30% of land	Solar power	25	0.000914913
Haiti	Multi-Sector	30% of land	Hydropower	150	0.00548948
Haiti	Multi-Sector	30% of land	Solar power	175	0.00640439
Haiti	Multi-Sector	30% of land	Wind power	225	0.00823422
Haiti	Multi-Sector	30% of land	Conservation	6150	0.225069
Haiti	Multi-Sector	30% of land	Current PAs	2175	0.0795974
Hungary	Multi-Sector	30% of land	Crops, food	750	0.00793231
Hungary	Multi-Sector	30% of land	Crops, energy	8350	0.0883131
Hungary	Multi-Sector	30% of land	Hydropower	25	0.00026441
Hungary	Multi-Sector	30% of land	Solar power	4725	0.0499736
Hungary	Multi-Sector	30% of land	Wind power	4575	0.0483871
Hungary	Multi-Sector	30% of land	Conservation	10625	0.112374
Hungary	Multi-Sector	30% of land	Current PAs	17975	0.190111
Indonesia	Multi-Sector	30% of land	Crops, food	31325	0.0164308
Indonesia	Multi-Sector	30% of land	Crops, energy	12350	0.00647792
Indonesia	Multi-Sector	30% of land	Solar power	2450	0.00128509
Indonesia	Multi-Sector	30% of land	Hydropower	125	6.5566e-05
Indonesia	Multi-Sector	30% of land	Solar power	14025	0.00735651
Indonesia	Multi-Sector	30% of land	Wind power	25800	0.0135328
Indonesia	Multi-Sector	30% of land	Conservation	350725	0.183965
Indonesia	Multi-Sector	30% of land	Current PAs	226925	0.119029
India	Multi-Sector	30% of land	Crops, food	33700	0.0104924
India	Multi-Sector	30% of land	Crops, energy	16600	0.00516836
India	Multi-Sector	30% of land	Solar power	11000	0.00342482
India	Multi-Sector	30% of land	Hydropower	275	8.56204e-05
India	Multi-Sector	30% of land	Solar power	100050	0.0311503
India	Multi-Sector	30% of land	Wind power	254775	0.0793234
India	Multi-Sector	30% of land	Conservation	947375	0.294962
India	Multi-Sector	30% of land	Current PAs	21575	0.00671731
Ireland	Multi-Sector	30% of land	Crops, food	25	0.000357015
Ireland	Multi-Sector	30% of land	Crops, energy	25	0.000357015
Ireland	Multi-Sector	30% of land	Hydropower	425	0.00606926
Ireland	Multi-Sector	30% of land	Solar power	1300	0.0185648
Ireland	Multi-Sector	30% of land	Wind power	2925	0.0417708
Ireland	Multi-Sector	30% of land	Conservation	13450	0.192074
Ireland	Multi-Sector	30% of land	Current PAs	8025	0.114602
Iran	Multi-Sector	30% of land	Crops, food	72100	0.0436427
Iran	Multi-Sector	30% of land	Crops, energy	2825	0.00171
Iran	Multi-Sector	30% of land	Solar power	4000	0.00242123
Iran	Multi-Sector	30% of land	Hydropower	10825	0.00655247
Iran	Multi-Sector	30% of land	Solar power	9075	0.00549318
Iran	Multi-Sector	30% of land	Wind power	89825	0.0543718
Iran	Multi-Sector	30% of land	Conservation	340075	0.20585
Iran	Multi-Sector	30% of land	Current PAs	139850	0.0846524
Iraq	Multi-Sector	30% of land	Crops, food	12350	0.0277341
Iraq	Multi-Sector	30% of land	Crops, energy	1200	0.00269481
Iraq	Multi-Sector	30% of land	Solar power	475	0.0010667
Iraq	Multi-Sector	30% of land	Hydropower	1100	0.00247024
Iraq	Multi-Sector	30% of land	Solar power	1050	0.00235796
Iraq	Multi-Sector	30% of land	Wind power	1500	0.00336852
Iraq	Multi-Sector	30% of land	Conservation	56850	0.127667
Iraq	Multi-Sector	30% of land	Current PAs	6525	0.014653
Iceland	Multi-Sector	30% of land	Hydropower	100	0.000971345
Iceland	Multi-Sector	30% of land	Wind power	1750	0.0169985
Iceland	Multi-Sector	30% of land	Conservation	9900	0.0961632
Iceland	Multi-Sector	30% of land	Current PAs	21000	0.203983
Israel	Multi-Sector	30% of land	Crops, food	300	0.0132159
Israel	Multi-Sector	30% of land	Crops, energy	25	0.00110132
Israel	Multi-Sector	30% of land	Solar power	500	0.0220264
Israel	Multi-Sector	30% of land	Hydropower	200	0.00881057
Israel	Multi-Sector	30% of land	Solar power	1275	0.0561674
Israel	Multi-Sector	30% of land	Wind power	1650	0.0726872
Israel	Multi-Sector	30% of land	Conservation	2325	0.102423
Israel	Multi-Sector	30% of land	Current PAs	4525	0.199339
Italy	Multi-Sector	30% of land	Crops, food	700	0.00229208
Italy	Multi-Sector	30% of land	Crops, energy	5225	0.0171087
Italy	Multi-Sector	30% of land	Solar power	2100	0.00687623
Italy	Multi-Sector	30% of land	Hydropower	3975	0.0130157
Italy	Multi-Sector	30% of land	Solar power	6600	0.021611
Italy	Multi-Sector	30% of land	Wind power	61975	0.202931
Italy	Multi-Sector	30% of land	Conservation	36400	0.119188
Italy	Multi-Sector	30% of land	Current PAs	56625	0.185413
Jamaica	Multi-Sector	30% of land	Crops, food	150	0.013363
Jamaica	Multi-Sector	30% of land	Crops, energy	425	0.0378619
Jamaica	Multi-Sector	30% of land	Solar power	25	0.00222717
Jamaica	Multi-Sector	30% of land	Hydropower	25	0.00222717
Jamaica	Multi-Sector	30% of land	Solar power	425	0.0378619
Jamaica	Multi-Sector	30% of land	Wind power	75	0.00668151
Jamaica	Multi-Sector	30% of land	Conservation	1350	0.120267
Jamaica	Multi-Sector	30% of land	Current PAs	2025	0.180401
Jordan	Multi-Sector	30% of land	Conservation	15175	0.167633
Jordan	Multi-Sector	30% of land	Current PAs	4025	0.0444629
Japan	Multi-Sector	30% of land	Crops, food	850	0.00225704
Japan	Multi-Sector	30% of land	Crops, energy	3850	0.010223
Japan	Multi-Sector	30% of land	Hydropower	11225	0.0298062
Japan	Multi-Sector	30% of land	Solar power	61250	0.162639
Japan	Multi-Sector	30% of land	Wind power	53650	0.142459
Japan	Multi-Sector	30% of land	Conservation	52425	0.139206
Japan	Multi-Sector	30% of land	Current PAs	62475	0.165892
Kazakhstan	Multi-Sector	30% of land	Crops, energy	22375	0.00810277
Kazakhstan	Multi-Sector	30% of land	Hydropower	400	0.000144854
Kazakhstan	Multi-Sector	30% of land	Solar power	1575	0.000570363
Kazakhstan	Multi-Sector	30% of land	Wind power	23700	0.0085826
Kazakhstan	Multi-Sector	30% of land	Conservation	567350	0.205457
Kazakhstan	Multi-Sector	30% of land	Current PAs	273250	0.0989534
Kenya	Multi-Sector	30% of land	Crops, food	9850	0.0162756
Kenya	Multi-Sector	30% of land	Crops, energy	875	0.0014458
Kenya	Multi-Sector	30% of land	Solar power	200	0.000330469
Kenya	Multi-Sector	30% of land	Hydropower	950	0.00156973
Kenya	Multi-Sector	30% of land	Solar power	200	0.000330469
Kenya	Multi-Sector	30% of land	Wind power	3400	0.00561798
Kenya	Multi-Sector	30% of land	Conservation	111675	0.184526
Kenya	Multi-Sector	30% of land	Current PAs	72325	0.119506
Kyrgyzstan	Multi-Sector	30% of land	Crops, energy	400	0.00197848
Kyrgyzstan	Multi-Sector	30% of land	Solar power	25	0.000123655
Kyrgyzstan	Multi-Sector	30% of land	Hydropower	150	0.000741931
Kyrgyzstan	Multi-Sector	30% of land	Solar power	100	0.000494621
Kyrgyzstan	Multi-Sector	30% of land	Wind power	6175	0.0305428
Kyrgyzstan	Multi-Sector	30% of land	Conservation	47675	0.235811
Kyrgyzstan	Multi-Sector	30% of land	Current PAs	13600	0.0672685
Cambodia	Multi-Sector	30% of land	Crops, food	11625	0.0629825
Cambodia	Multi-Sector	30% of land	Crops, energy	7425	0.0402275
Cambodia	Multi-Sector	30% of land	Solar power	100	0.000541785
Cambodia	Multi-Sector	30% of land	Hydropower	50	0.000270893
Cambodia	Multi-Sector	30% of land	Solar power	400	0.00216714
Cambodia	Multi-Sector	30% of land	Wind power	3350	0.0181498
Cambodia	Multi-Sector	30% of land	Current PAs	72950	0.395232
South Korea	Multi-Sector	30% of land	Crops, food	1825	0.018453
South Korea	Multi-Sector	30% of land	Crops, energy	6500	0.065723
South Korea	Multi-Sector	30% of land	Solar power	2875	0.0290698
South Korea	Multi-Sector	30% of land	Hydropower	3950	0.0399393
South Korea	Multi-Sector	30% of land	Solar power	21200	0.214358
South Korea	Multi-Sector	30% of land	Wind power	8950	0.0904954
South Korea	Multi-Sector	30% of land	Conservation	17725	0.179221
South Korea	Multi-Sector	30% of land	Current PAs	12150	0.122851
Kosovo	Multi-Sector	30% of land	Crops, energy	800	0.0715884
Kosovo	Multi-Sector	30% of land	Solar power	500	0.0447427
Kosovo	Multi-Sector	30% of land	Wind power	1100	0.098434
Kosovo	Multi-Sector	30% of land	Conservation	3700	0.331096
Kosovo	Multi-Sector	30% of land	Current PAs	400	0.0357942
Kuwait	Multi-Sector	30% of land	Crops, food	175	0.00988701
Kuwait	Multi-Sector	30% of land	Solar power	750	0.0423729
Kuwait	Multi-Sector	30% of land	Solar power	6025	0.340395
Kuwait	Multi-Sector	30% of land	Wind power	350	0.019774
Kuwait	Multi-Sector	30% of land	Conservation	2875	0.162429
Kuwait	Multi-Sector	30% of land	Current PAs	2575	0.14548
Laos	Multi-Sector	30% of land	Crops, food	8925	0.0382801
Laos	Multi-Sector	30% of land	Crops, energy	3300	0.014154
Laos	Multi-Sector	30% of land	Hydropower	375	0.00160841
Laos	Multi-Sector	30% of land	Solar power	50	0.000214454
Laos	Multi-Sector	30% of land	Conservation	28175	0.120845
Laos	Multi-Sector	30% of land	Current PAs	43125	0.184967
Liberia	Multi-Sector	30% of land	Crops, food	4350	0.0446383
Liberia	Multi-Sector	30% of land	Crops, energy	550	0.00564392
Liberia	Multi-Sector	30% of land	Hydropower	75	0.000769625
Liberia	Multi-Sector	30% of land	Solar power	25	0.000256542
Liberia	Multi-Sector	30% of land	Conservation	25775	0.264495
Liberia	Multi-Sector	30% of land	Current PAs	3875	0.039764
Libya	Multi-Sector	30% of land	Conservation	171600	0.103665
Libya	Multi-Sector	30% of land	Current PAs	1525	0.000921269
Sri Lanka	Multi-Sector	30% of land	Crops, food	1575	0.0234637
Sri Lanka	Multi-Sector	30% of land	Crops, energy	950	0.0141527
Sri Lanka	Multi-Sector	30% of land	Solar power	150	0.00223464
Sri Lanka	Multi-Sector	30% of land	Hydropower	700	0.0104283
Sri Lanka	Multi-Sector	30% of land	Solar power	575	0.00856611
Sri Lanka	Multi-Sector	30% of land	Wind power	4700	0.0700186
Sri Lanka	Multi-Sector	30% of land	Conservation	1200	0.0178771
Sri Lanka	Multi-Sector	30% of land	Current PAs	19000	0.283054
Lesotho	Multi-Sector	30% of land	Crops, food	1400	0.0457516
Lesotho	Multi-Sector	30% of land	Crops, energy	700	0.0228758
Lesotho	Multi-Sector	30% of land	Hydropower	150	0.00490196
Lesotho	Multi-Sector	30% of land	Conservation	3250	0.106209
Lesotho	Multi-Sector	30% of land	Current PAs	6125	0.200163
Lithuania	Multi-Sector	30% of land	Crops, food	350	0.00532319
Lithuania	Multi-Sector	30% of land	Crops, energy	9475	0.144106
Lithuania	Multi-Sector	30% of land	Hydropower	300	0.00456274
Lithuania	Multi-Sector	30% of land	Solar power	600	0.00912548
Lithuania	Multi-Sector	30% of land	Wind power	3375	0.0513308
Lithuania	Multi-Sector	30% of land	Conservation	10650	0.161977
Lithuania	Multi-Sector	30% of land	Current PAs	9300	0.141445
Latvia	Multi-Sector	30% of land	Crops, food	125	0.00190985
Latvia	Multi-Sector	30% of land	Crops, energy	2600	0.039725
Latvia	Multi-Sector	30% of land	Hydropower	100	0.00152788
Latvia	Multi-Sector	30% of land	Solar power	400	0.00611154
Latvia	Multi-Sector	30% of land	Wind power	1850	0.0282659
Latvia	Multi-Sector	30% of land	Conservation	9575	0.146295
Latvia	Multi-Sector	30% of land	Current PAs	10275	0.15699
Morocco	Multi-Sector	30% of land	Crops, food	43725	0.0737259
Morocco	Multi-Sector	30% of land	Crops, energy	2825	0.00476331
Morocco	Multi-Sector	30% of land	Solar power	275	0.000463685
Morocco	Multi-Sector	30% of land	Hydropower	1975	0.0033301
Morocco	Multi-Sector	30% of land	Solar power	450	0.000758757
Morocco	Multi-Sector	30% of land	Wind power	7075	0.0119294
Morocco	Multi-Sector	30% of land	Conservation	83675	0.141087
Morocco	Multi-Sector	30% of land	Current PAs	122650	0.206804
Moldova	Multi-Sector	30% of land	Crops, energy	200	0.00594796
Moldova	Multi-Sector	30% of land	Hydropower	100	0.00297398
Moldova	Multi-Sector	30% of land	Solar power	175	0.00520446
Moldova	Multi-Sector	30% of land	Wind power	1800	0.0535316
Moldova	Multi-Sector	30% of land	Conservation	7825	0.232714
Moldova	Multi-Sector	30% of land	Current PAs	2400	0.0713755
Madagascar	Multi-Sector	30% of land	Crops, food	1825	0.00301366
Madagascar	Multi-Sector	30% of land	Crops, energy	275	0.000454114
Madagascar	Multi-Sector	30% of land	Hydropower	25	4.12831e-05
Madagascar	Multi-Sector	30% of land	Solar power	100	0.000165132
Madagascar	Multi-Sector	30% of land	Conservation	139300	0.230029
Madagascar	Multi-Sector	30% of land	Current PAs	44500	0.0734839
Mexico	Multi-Sector	30% of land	Crops, food	3225	0.00161512
Mexico	Multi-Sector	30% of land	Crops, energy	5975	0.00299236
Mexico	Multi-Sector	30% of land	Solar power	725	0.00036309
Mexico	Multi-Sector	30% of land	Hydropower	1800	0.000901465
Mexico	Multi-Sector	30% of land	Solar power	7950	0.00398147
Mexico	Multi-Sector	30% of land	Wind power	39725	0.0198948
Mexico	Multi-Sector	30% of land	Conservation	322125	0.161325
Mexico	Multi-Sector	30% of land	Current PAs	286750	0.143608
Macedonia	Multi-Sector	30% of land	Crops, food	400	0.0154291
Macedonia	Multi-Sector	30% of land	Crops, energy	4625	0.178399
Macedonia	Multi-Sector	30% of land	Hydropower	250	0.0096432
Macedonia	Multi-Sector	30% of land	Solar power	500	0.0192864
Macedonia	Multi-Sector	30% of land	Wind power	2200	0.0848602
Macedonia	Multi-Sector	30% of land	Conservation	3825	0.147541
Macedonia	Multi-Sector	30% of land	Current PAs	4050	0.15622
Mali	Multi-Sector	30% of land	Crops, food	17225	0.0134489
Mali	Multi-Sector	30% of land	Crops, energy	3400	0.00265464
Mali	Multi-Sector	30% of land	Hydropower	325	0.000253753
Mali	Multi-Sector	30% of land	Solar power	700	0.000546544
Mali	Multi-Sector	30% of land	Conservation	220150	0.171888
Mali	Multi-Sector	30% of land	Current PAs	96750	0.0755402
Myanmar	Multi-Sector	30% of land	Crops, food	5925	0.00878233
Myanmar	Multi-Sector	30% of land	Crops, energy	3025	0.00448381
Myanmar	Multi-Sector	30% of land	Solar power	150	0.000222338
Myanmar	Multi-Sector	30% of land	Hydropower	75	0.000111169
Myanmar	Multi-Sector	30% of land	Solar power	575	0.000852294
Myanmar	Multi-Sector	30% of land	Wind power	8475	0.0125621
Myanmar	Multi-Sector	30% of land	Conservation	159875	0.236975
Myanmar	Multi-Sector	30% of land	Current PAs	43975	0.0651819
Montenegro	Multi-Sector	30% of land	Crops, food	50	0.00358423
Montenegro	Multi-Sector	30% of land	Crops, energy	200	0.0143369
Montenegro	Multi-Sector	30% of land	Solar power	25	0.00179211
Montenegro	Multi-Sector	30% of land	Hydropower	25	0.00179211
Montenegro	Multi-Sector	30% of land	Solar power	75	0.00537634
Montenegro	Multi-Sector	30% of land	Wind power	650	0.046595
Montenegro	Multi-Sector	30% of land	Conservation	2425	0.173835
Montenegro	Multi-Sector	30% of land	Current PAs	1825	0.130824
Mongolia	Multi-Sector	30% of land	Crops, food	76900	0.048428
Mongolia	Multi-Sector	30% of land	Crops, energy	28075	0.0176803
Mongolia	Multi-Sector	30% of land	Hydropower	25	1.57438e-05
Mongolia	Multi-Sector	30% of land	Solar power	450	0.000283389
Mongolia	Multi-Sector	30% of land	Wind power	1700	0.00107058
Mongolia	Multi-Sector	30% of land	Conservation	164200	0.103405
Mongolia	Multi-Sector	30% of land	Current PAs	312600	0.196861
Mozambique	Multi-Sector	30% of land	Crops, food	4500	0.00559093
Mozambique	Multi-Sector	30% of land	Crops, energy	975	0.00121137
Mozambique	Multi-Sector	30% of land	Solar power	200	0.000248486
Mozambique	Multi-Sector	30% of land	Hydropower	250	0.000310607
Mozambique	Multi-Sector	30% of land	Solar power	200	0.000248486
Mozambique	Multi-Sector	30% of land	Wind power	4425	0.00549775
Mozambique	Multi-Sector	30% of land	Conservation	4900	0.0060879
Mozambique	Multi-Sector	30% of land	Current PAs	237700	0.295325
Mauritania	Multi-Sector	30% of land	Crops, food	6900	0.00653456
Mauritania	Multi-Sector	30% of land	Crops, energy	200	0.000189407
Mauritania	Multi-Sector	30% of land	Solar power	300	0.000284111
Mauritania	Multi-Sector	30% of land	Wind power	1400	0.00132585
Mauritania	Multi-Sector	30% of land	Conservation	268950	0.254706
Mauritania	Multi-Sector	30% of land	Current PAs	6375	0.00603736
Malawi	Multi-Sector	30% of land	Crops, food	2100	0.0172025
Malawi	Multi-Sector	30% of land	Crops, energy	525	0.00430063
Malawi	Multi-Sector	30% of land	Hydropower	100	0.000819169
Malawi	Multi-Sector	30% of land	Solar power	425	0.00348147
Malawi	Multi-Sector	30% of land	Conservation	11725	0.0960475
Malawi	Multi-Sector	30% of land	Current PAs	25350	0.207659
Malaysia	Multi-Sector	30% of land	Crops, food	2275	0.00682261
Malaysia	Multi-Sector	30% of land	Crops, energy	775	0.00232419
Malaysia	Multi-Sector	30% of land	Solar power	1325	0.00397361
Malaysia	Multi-Sector	30% of land	Hydropower	550	0.00164942
Malaysia	Multi-Sector	30% of land	Solar power	10300	0.0308892
Malaysia	Multi-Sector	30% of land	Wind power	1050	0.0031489
Malaysia	Multi-Sector	30% of land	Conservation	59800	0.179337
Malaysia	Multi-Sector	30% of land	Current PAs	41900	0.125656
Namibia	Multi-Sector	30% of land	Crops, food	3225	0.00383883
Namibia	Multi-Sector	30% of land	Crops, energy	250	0.000297584
Namibia	Multi-Sector	30% of land	Solar power	50	5.95167e-05
Namibia	Multi-Sector	30% of land	Hydropower	50	5.95167e-05
Namibia	Multi-Sector	30% of land	Solar power	50	5.95167e-05
Namibia	Multi-Sector	30% of land	Wind power	1150	0.00136888
Namibia	Multi-Sector	30% of land	Current PAs	317350	0.377753
Niger	Multi-Sector	30% of land	Crops, food	15275	0.0126629
Niger	Multi-Sector	30% of land	Crops, energy	350	0.000290149
Niger	Multi-Sector	30% of land	Solar power	50	4.14499e-05
Niger	Multi-Sector	30% of land	Solar power	75	6.21749e-05
Niger	Multi-Sector	30% of land	Wind power	750	0.000621749
Niger	Multi-Sector	30% of land	Conservation	140925	0.116827
Niger	Multi-Sector	30% of land	Current PAs	224450	0.186069
Nigeria	Multi-Sector	30% of land	Crops, food	26625	0.0286892
Nigeria	Multi-Sector	30% of land	Crops, energy	5275	0.00568396
Nigeria	Multi-Sector	30% of land	Solar power	1650	0.00177792
Nigeria	Multi-Sector	30% of land	Hydropower	575	0.000619579
Nigeria	Multi-Sector	30% of land	Solar power	5325	0.00573784
Nigeria	Multi-Sector	30% of land	Wind power	2300	0.00247831
Nigeria	Multi-Sector	30% of land	Conservation	157375	0.169576
Nigeria	Multi-Sector	30% of land	Current PAs	122950	0.132482
Nicaragua	Multi-Sector	30% of land	Crops, food	200	0.00152149
Nicaragua	Multi-Sector	30% of land	Crops, energy	350	0.00266261
Nicaragua	Multi-Sector	30% of land	Solar power	25	0.000190186
Nicaragua	Multi-Sector	30% of land	Hydropower	50	0.000380373
Nicaragua	Multi-Sector	30% of land	Solar power	100	0.000760746
Nicaragua	Multi-Sector	30% of land	Wind power	375	0.0028528
Nicaragua	Multi-Sector	30% of land	Conservation	12400	0.0943324
Nicaragua	Multi-Sector	30% of land	Current PAs	27225	0.207113
Netherlands	Multi-Sector	30% of land	Crops, food	225	0.00592885
Netherlands	Multi-Sector	30% of land	Crops, energy	1750	0.0461133
Netherlands	Multi-Sector	30% of land	Hydropower	25	0.000658762
Netherlands	Multi-Sector	30% of land	Solar power	12500	0.329381
Netherlands	Multi-Sector	30% of land	Wind power	5525	0.145586
Netherlands	Multi-Sector	30% of land	Conservation	5700	0.150198
Netherlands	Multi-Sector	30% of land	Current PAs	5925	0.156126
Norway	Multi-Sector	30% of land	Crops, food	200	0.000511902
Norway	Multi-Sector	30% of land	Crops, energy	1175	0.00300742
Norway	Multi-Sector	30% of land	Hydropower	4875	0.0124776
Norway	Multi-Sector	30% of land	Solar power	1275	0.00326337
Norway	Multi-Sector	30% of land	Wind power	3750	0.00959816
Norway	Multi-Sector	30% of land	Conservation	20275	0.051894
Norway	Multi-Sector	30% of land	Current PAs	97425	0.24936
Nepal	Multi-Sector	30% of land	Crops, food	800	0.00534759
Nepal	Multi-Sector	30% of land	Crops, energy	500	0.00334225
Nepal	Multi-Sector	30% of land	Solar power	100	0.000668449
Nepal	Multi-Sector	30% of land	Hydropower	50	0.000334225
Nepal	Multi-Sector	30% of land	Solar power	1575	0.0105281
Nepal	Multi-Sector	30% of land	Conservation	11700	0.0782086
Nepal	Multi-Sector	30% of land	Current PAs	33275	0.222426
New Zealand	Multi-Sector	30% of land	Solar power	350	0.00128724
New Zealand	Multi-Sector	30% of land	Hydropower	375	0.00137918
New Zealand	Multi-Sector	30% of land	Solar power	1275	0.00468922
New Zealand	Multi-Sector	30% of land	Wind power	8450	0.0310776
New Zealand	Multi-Sector	30% of land	Current PAs	83150	0.305811
Oman	Multi-Sector	30% of land	Crops, food	525	0.00165367
Oman	Multi-Sector	30% of land	Crops, energy	50	0.000157493
Oman	Multi-Sector	30% of land	Solar power	750	0.00236239
Oman	Multi-Sector	30% of land	Solar power	3725	0.0117332
Oman	Multi-Sector	30% of land	Wind power	4925	0.015513
Oman	Multi-Sector	30% of land	Conservation	58300	0.183637
Oman	Multi-Sector	30% of land	Current PAs	10900	0.0343334
Pakistan	Multi-Sector	30% of land	Crops, food	37800	0.0424838
Pakistan	Multi-Sector	30% of land	Crops, energy	7675	0.00862602
Pakistan	Multi-Sector	30% of land	Solar power	900	0.00101152
Pakistan	Multi-Sector	30% of land	Hydropower	125	0.000140489
Pakistan	Multi-Sector	30% of land	Solar power	9475	0.0106491
Pakistan	Multi-Sector	30% of land	Wind power	22000	0.024726
Pakistan	Multi-Sector	30% of land	Conservation	173250	0.194718
Pakistan	Multi-Sector	30% of land	Current PAs	96625	0.108598
Panama	Multi-Sector	30% of land	Crops, food	50	0.000665557
Panama	Multi-Sector	30% of land	Crops, energy	75	0.000998336
Panama	Multi-Sector	30% of land	Solar power	75	0.000998336
Panama	Multi-Sector	30% of land	Hydropower	475	0.0063228
Panama	Multi-Sector	30% of land	Solar power	400	0.00532446
Panama	Multi-Sector	30% of land	Wind power	2100	0.0279534
Panama	Multi-Sector	30% of land	Conservation	275	0.00366057
Panama	Multi-Sector	30% of land	Current PAs	22350	0.297504
Peru	Multi-Sector	30% of land	Crops, food	125	9.47454e-05
Peru	Multi-Sector	30% of land	Crops, energy	175	0.000132644
Peru	Multi-Sector	30% of land	Solar power	100	7.57963e-05
Peru	Multi-Sector	30% of land	Hydropower	50	3.78982e-05
Peru	Multi-Sector	30% of land	Solar power	1700	0.00128854
Peru	Multi-Sector	30% of land	Wind power	4100	0.00310765
Peru	Multi-Sector	30% of land	Conservation	97500	0.0739014
Peru	Multi-Sector	30% of land	Current PAs	298975	0.226612
Philippines	Multi-Sector	30% of land	Crops, food	7175	0.0242727
Philippines	Multi-Sector	30% of land	Crops, energy	3100	0.0104871
Philippines	Multi-Sector	30% of land	Solar power	500	0.00169147
Philippines	Multi-Sector	30% of land	Hydropower	875	0.00296008
Philippines	Multi-Sector	30% of land	Solar power	3225	0.01091
Philippines	Multi-Sector	30% of land	Wind power	3600	0.0121786
Philippines	Multi-Sector	30% of land	Conservation	42150	0.142591
Philippines	Multi-Sector	30% of land	Current PAs	47775	0.16162
Papua New Guinea	Multi-Sector	30% of land	Crops, food	1475	0.00312037
Papua New Guinea	Multi-Sector	30% of land	Crops, energy	950	0.00200973
Papua New Guinea	Multi-Sector	30% of land	Hydropower	25	5.28877e-05
Papua New Guinea	Multi-Sector	30% of land	Solar power	25	5.28877e-05
Papua New Guinea	Multi-Sector	30% of land	Conservation	127825	0.270415
Papua New Guinea	Multi-Sector	30% of land	Current PAs	17600	0.0372329
Poland	Multi-Sector	30% of land	Crops, food	2550	0.00802076
Poland	Multi-Sector	30% of land	Crops, energy	21000	0.0660533
Poland	Multi-Sector	30% of land	Hydropower	1900	0.00597625
Poland	Multi-Sector	30% of land	Solar power	4625	0.0145475
Poland	Multi-Sector	30% of land	Wind power	34100	0.107258
Poland	Multi-Sector	30% of land	Current PAs	122175	0.384289
North Korea	Multi-Sector	30% of land	Crops, food	1100	0.00884244
North Korea	Multi-Sector	30% of land	Crops, energy	3900	0.0313505
North Korea	Multi-Sector	30% of land	Solar power	25	0.000200965
North Korea	Multi-Sector	30% of land	Hydropower	11300	0.090836
North Korea	Multi-Sector	30% of land	Solar power	1125	0.00904341
North Korea	Multi-Sector	30% of land	Wind power	10800	0.0868167
North Korea	Multi-Sector	30% of land	Conservation	34775	0.279542
North Korea	Multi-Sector	30% of land	Current PAs	2925	0.0235129
Portugal	Multi-Sector	30% of land	Crops, food	475	0.00514905
Portugal	Multi-Sector	30% of land	Crops, energy	1075	0.0116531
Portugal	Multi-Sector	30% of land	Solar power	300	0.00325203
Portugal	Multi-Sector	30% of land	Hydropower	5725	0.0620596
Portugal	Multi-Sector	30% of land	Solar power	650	0.00704607
Portugal	Multi-Sector	30% of land	Wind power	5750	0.0623306
Portugal	Multi-Sector	30% of land	Conservation	8250	0.0894309
Portugal	Multi-Sector	30% of land	Current PAs	19650	0.213008
Paraguay	Multi-Sector	30% of land	Crops, food	450	0.00110335
Paraguay	Multi-Sector	30% of land	Crops, energy	1400	0.00343263
Paraguay	Multi-Sector	30% of land	Solar power	25	6.1297e-05
Paraguay	Multi-Sector	30% of land	Hydropower	1000	0.00245188
Paraguay	Multi-Sector	30% of land	Solar power	125	0.000306485
Paraguay	Multi-Sector	30% of land	Wind power	300	0.000735565
Paraguay	Multi-Sector	30% of land	Conservation	66175	0.162253
Paraguay	Multi-Sector	30% of land	Current PAs	57750	0.141596
Qatar	Multi-Sector	30% of land	Solar power	625	0.0550661
Qatar	Multi-Sector	30% of land	Solar power	4325	0.381057
Qatar	Multi-Sector	30% of land	Wind power	400	0.0352423
Qatar	Multi-Sector	30% of land	Conservation	1700	0.14978
Qatar	Multi-Sector	30% of land	Current PAs	1475	0.129956
Romania	Multi-Sector	30% of land	Crops, food	1050	0.00437136
Romania	Multi-Sector	30% of land	Crops, energy	11525	0.0479808
Romania	Multi-Sector	30% of land	Hydropower	4500	0.0187344
Romania	Multi-Sector	30% of land	Solar power	1650	0.00686928
Romania	Multi-Sector	30% of land	Wind power	18775	0.078164
Romania	Multi-Sector	30% of land	Conservation	21950	0.0913822
Romania	Multi-Sector	30% of land	Current PAs	51100	0.212739
Russia	Multi-Sector	30% of land	Crops, energy	17275	0.00100728
Russia	Multi-Sector	30% of land	Solar power	175	1.0204e-05
Russia	Multi-Sector	30% of land	Hydropower	1050	6.12239e-05
Russia	Multi-Sector	30% of land	Solar power	7025	0.000409617
Russia	Multi-Sector	30% of land	Wind power	146950	0.00856843
Russia	Multi-Sector	30% of land	Conservation	3268725	0.190594
Russia	Multi-Sector	30% of land	Current PAs	1929850	0.112527
Rwanda	Multi-Sector	30% of land	Crops, food	1850	0.0715667
Rwanda	Multi-Sector	30% of land	Crops, energy	300	0.0116054
Rwanda	Multi-Sector	30% of land	Hydropower	375	0.0145068
Rwanda	Multi-Sector	30% of land	Solar power	100	0.00386847
Rwanda	Multi-Sector	30% of land	Conservation	5425	0.209865
Rwanda	Multi-Sector	30% of land	Current PAs	2375	0.0918762
Western Sahara	Multi-Sector	30% of land	Wind power	775	0.00833557
Western Sahara	Multi-Sector	30% of land	Conservation	225	0.00242001
Saudi Arabia	Multi-Sector	30% of land	Crops, food	27500	0.0140329
Saudi Arabia	Multi-Sector	30% of land	Crops, energy	150	7.65433e-05
Saudi Arabia	Multi-Sector	30% of land	Solar power	4000	0.00204115
Saudi Arabia	Multi-Sector	30% of land	Solar power	8725	0.00445227
Saudi Arabia	Multi-Sector	30% of land	Wind power	128850	0.0657507
Saudi Arabia	Multi-Sector	30% of land	Conservation	94050	0.0479927
Saudi Arabia	Multi-Sector	30% of land	Current PAs	220450	0.112493
Sudan	Multi-Sector	30% of land	Crops, food	46575	0.0245435
Sudan	Multi-Sector	30% of land	Crops, energy	6125	0.00322768
Sudan	Multi-Sector	30% of land	Solar power	250	0.000131742
Sudan	Multi-Sector	30% of land	Hydropower	150	7.90451e-05
Sudan	Multi-Sector	30% of land	Solar power	275	0.000144916
Sudan	Multi-Sector	30% of land	Wind power	5825	0.00306959
Sudan	Multi-Sector	30% of land	Conservation	541500	0.285353
Sudan	Multi-Sector	30% of land	Current PAs	34125	0.0179828
South Sudan	Multi-Sector	30% of land	Crops, food	875	0.00137784
South Sudan	Multi-Sector	30% of land	Crops, energy	100	0.000157468
South Sudan	Multi-Sector	30% of land	Solar power	25	3.9367e-05
South Sudan	Multi-Sector	30% of land	Solar power	25	3.9367e-05
South Sudan	Multi-Sector	30% of land	Wind power	275	0.000433037
South Sudan	Multi-Sector	30% of land	Conservation	85525	0.134674
South Sudan	Multi-Sector	30% of land	Current PAs	105600	0.166286
[truncated: 4,641 more rows]
